# Supplementary material for: Modeling of Environmental Effects in Genome-Wide Association Studies Identifies SLC2A2 and HP as Novel Loci Influencing Serum Cholesterol Levels
Source: PLoS Genet. 2010 Jan 8;6(1):e1000798. doi: 10.1371/journal.pgen.1000798 (PMC2792712; doi:10.1371/journal.pgen.1000798)
Supplement: Table S4 — GWAS results for all top SNPs (0.05%) in the Swedish (SE) discovery cohort, and for all candidate SNPs in the Scottish (SC), and in the non-Swedish (NS) replication cohorts including only individuals without lipid-lowering treatment. (0.34 MB XLS) [file pgen.1000798.s008.xls]

## Sheet: Documentation
Table S4. GWAS results for all top candidate SNPs (0.05%) in the Swedish (SE) discovery cohort, the Scottish (SC), and all non-Swedish (NS) replication cohorts including only individuals without lipid-lowering treatment.
The tables S1. a-d) show the GWAS results for the Swedish (SE) EUROSPAN cohort of the top 0.05% (~150 SNPs) with the lowest p-values of the adjusted model.
The tables S1. e-h) show the CGAS results for the Scottish (SC) EUROSPAN cohort.
The tables S1. i-l) show the CGAS results for the Non-Swedish (NS) EUROSPAN cohorts.
The methodological approach is described in more detail in the original paper.
Abbreviations
SE	Swedish EUROSPAN Cohort, Discovery Cohort
SC	Scottish EUROSPAN Cohort, Replication cohort I (diet and activity-adjusted model)
NS	Non-Swedish EUROSPAN cohorts, Relication cohort II (sex and age adjusted model, but unadjusted for diet and activity)
LLT	Lipid Lowering Treatment
TC	Total Cholesterol
LDL-C	Low Density Lipoprotein Cholesterol
HDL-C	High Density Lipoprotein Cholesterol
TG	Triglycerides
adj	"adjusted" analyis model adjusted for sex, age, game meat, non-game meat, fish, milk products, physical activity at work, physical activity at leisure
una	"unadjusted" analyis model adjusted for sex, age, but unadjusted for all other covariates
	Table sorted by the highlighted column (P1df.adj)

## Sheet: S4a_SE_TC_NoLLT
SNP	Chromosome	Position	Coding	Strand	SampleSize.total	CallRate	p.HWE	Q.2	P.11	P.12	P.22	SampleSize.una	SampleSize.adj	effB.una	effB.adj	P1df.una	P1df.adj	p.ratio.unaBYadj	p.ratio.adjBYuna	SNP.rank.una	SNP.rank.adj
rs4474804	11	33996261	AG	+	655	0.998476	0.543898	0.342748	279	303	73	593	569	0.275431	0.290161	2.78223e-06	3.95521e-07	7.03434	0.14216	1	1
rs10845527	4	12349801	AG	+	656	1	0.655817	0.0480183	595	59	2	593	569	0.560004	0.623569	9.09943e-06	4.55648e-07	19.9703	0.0500743	6	2
rs10513684	16	172206904	GA	+	649	0.989329	0.339287	0.144068	472	167	10	587	563	0.33354	0.369062	3.45852e-05	2.43533e-06	14.2015	0.0704153	21	3
rs5400	16	172214994	GA	+	653	0.995427	0.289918	0.209801	403	226	24	591	567	0.276947	0.304335	5.95508e-05	5.33585e-06	11.1605	0.0896016	31	4
rs3764312	8	70683234	AC	+	628	0.957317	0.210802	0.29379	320	247	61	570	548	0.232578	0.268317	0.000141354	6.34639e-06	22.2731	0.0448972	49	5
rs10518312	17	120160960	AG	+	654	0.996951	0.318831	0.109327	516	133	5	591	568	-0.400798	-0.393084	1.24822e-05	9.08551e-06	1.37385	0.72788	8	6
rs6772861	16	142901533	GA	+	655	0.998476	0.596886	0.0801527	555	95	5	592	568	0.353186	0.42097	0.000422375	1.74687e-05	24.1789	0.0413584	126	7
rs10804838	16	171339701	AG	+	655	0.998476	0.876131	0.147328	475	167	13	592	568	0.291442	0.328841	0.000195513	1.76782e-05	11.0596	0.0904194	64	8
rs12610185	11	19582722	GA	+	656	1	0.857282	0.123476	503	144	9	593	569	-0.393031	-0.357602	4.90716e-06	1.80023e-05	0.272585	3.66858	4	9
rs2228603	11	19190924	GA	+	649	0.989329	1	0.134823	485	153	11	587	563	-0.380183	-0.342382	4.52642e-06	2.02473e-05	0.223557	4.47313	3	10
rs33431	11	35631829	AG	+	656	1	0.84743	0.282774	336	269	51	593	569	-0.236077	-0.256559	0.000137034	2.12642e-05	6.44435	0.155175	46	11
rs33430	11	35631283	GA	+	653	0.995427	0.923116	0.281776	336	266	51	591	567	-0.236236	-0.256153	0.000136212	2.20376e-05	6.18092	0.161788	45	12
rs12248205	2	73176520	CA	+	656	1	0.389999	0.489329	165	340	151	593	569	0.214867	0.22458	0.000104054	2.763e-05	3.766	0.265534	39	13
rs10823837	2	73168916	GA	+	655	0.998476	0.390273	0.49084	164	339	152	592	568	0.21801	0.225507	8.63229e-05	2.80111e-05	3.08174	0.324492	38	14
rs10819309	22	129621544	GA	+	634	0.966463	0.356586	0.384069	246	289	99	572	549	-0.232087	-0.238787	6.96397e-05	2.89187e-05	2.40812	0.415261	36	15
rs10759611	22	114723250	AG	+	647	0.98628	0.035454	0.373261	267	277	103	586	562	0.209833	0.22811	0.000196468	3.42097e-05	5.74306	0.174123	65	16
rs8108647	11	19288623	AG	+	656	1	1	0.183689	437	197	22	593	569	-0.323097	-0.288261	7.09561e-06	3.57519e-05	0.198468	5.0386	5	17
rs2207781	2	83755204	GA	+	652	0.993902	0.513988	0.183282	432	201	19	590	566	0.317947	0.295472	1.42471e-05	3.74853e-05	0.380072	2.63108	10	18
rs6685931	1	195133856	AG	+	650	0.990854	0.0638683	0.416154	233	293	124	587	563	0.183739	0.221198	0.000900531	3.7495e-05	24.0174	0.0416365	255	19
rs11919048	16	172056859	GA	+	654	0.996951	0.248583	0.214832	398	231	25	591	567	0.246342	0.271846	0.000316694	4.0425e-05	7.83411	0.127647	94	20
rs10989286	22	102671324	AG	+	652	0.993902	0.0689733	0.0391104	604	45	3	590	567	-0.533123	-0.528379	6.54161e-05	4.24499e-05	1.54102	0.648921	34	21
rs968525	11	19320215	GA	+	654	0.996951	0.692506	0.181193	440	191	23	591	567	-0.319842	-0.285648	9.93692e-06	4.6811e-05	0.212277	4.71082	7	22
rs10733600	22	114726045	AC	+	653	0.995427	0.0973812	0.381317	260	288	105	591	567	0.205928	0.222255	0.000243957	5.01142e-05	4.86801	0.205423	74	23
rs10882023	2	93842643	AG	+	656	1	1	0.26753	352	257	47	593	569	-0.216361	-0.249255	0.000638755	5.26039e-05	12.1427	0.0823538	187	25
rs1878424	2	93814060	GA	+	656	1	0.920817	0.266768	353	256	47	593	569	-0.216361	-0.249255	0.000638755	5.26039e-05	12.1427	0.0823538	186	24
rs2377102	16	185968242	GA	+	650	0.990854	0.740102	0.383846	249	303	98	588	565	0.185676	0.226121	0.00115269	5.29934e-05	21.7516	0.0459737	318	26
rs2304130	11	19650528	AG	+	656	1	0.515938	0.140244	487	154	15	593	569	-0.33953	-0.311353	2.01211e-05	5.42323e-05	0.371018	2.69529	14	27
rs10415849	11	19366087	GA	+	655	0.998476	0.257277	0.139695	481	165	9	592	568	-0.377823	-0.32006	4.32097e-06	5.9224e-05	0.0729598	13.7062	2	28
rs10985573	22	100042689	AG	+	656	1	1	0.0442073	599	56	1	593	569	0.551191	0.521946	4.1737e-05	5.96251e-05	0.69999	1.42859	26	29
rs8111071	11	50999246	AG	+	656	1	1	0.0327744	613	43	0	593	569	0.646027	0.591638	2.39608e-05	6.13741e-05	0.390406	2.56143	17	30
rs1538157	22	1278320	GA	+	656	1	0.399362	0.0503049	590	66	0	593	569	0.464034	0.52455	0.000550439	6.16253e-05	8.93203	0.111957	164	31
rs4808199	11	19406099	GA	+	656	1	1	0.182165	438	197	21	593	569	-0.319517	-0.283949	1.25436e-05	6.26674e-05	0.200162	4.99595	9	32
rs4238458	7	71037538	AG	+	654	0.996951	0.718061	0.123853	503	140	11	591	567	-0.275331	-0.335658	0.00112532	6.43187e-05	17.4959	0.0571561	311	33
rs4832217	12	85973370	AG	+	656	1	0.137117	0.478659	188	308	160	593	569	0.235073	0.211546	1.55799e-05	6.53071e-05	0.238564	4.19174	11	34
rs12593919	7	91450126	AG	+	656	1	0.257386	0.165396	461	173	22	593	569	0.299511	0.287109	6.33784e-05	7.1941e-05	0.880978	1.1351	32	35
rs2070657	14	26276888	AG	+	655	0.998476	0.913427	0.235115	382	238	35	592	568	-0.25188	-0.256369	0.000153411	7.38817e-05	2.07644	0.481593	53	36
rs12192181	19	15856451	CA	+	656	1	0.154058	0.125	498	152	6	593	569	0.33382	0.3334	0.000109528	7.97494e-05	1.37341	0.728116	41	37
rs1571176	2	93882133	CA	+	655	0.998476	1	0.265649	353	256	46	592	568	-0.20974	-0.24206	0.000941348	8.69644e-05	10.8245	0.0923829	265	38
rs1028656	22	100692494	GA	+	655	0.998476	0.126546	0.0442748	600	52	3	592	568	0.49037	0.494487	0.000183972	8.70925e-05	2.11237	0.473401	62	39
rs571598	9	64839401	CA	+	654	0.996951	0.125641	0.20948	402	230	22	591	568	0.213475	0.260898	0.00185645	9.43688e-05	19.6723	0.050833	512	40
rs10401193	11	19452066	AG	+	652	0.993902	0.792652	0.182515	434	198	20	589	565	-0.314799	-0.278075	1.87321e-05	9.70136e-05	0.193087	5.17901	13	41
rs10749041	2	112408768	AG	+	656	1	0.461641	0.121189	504	145	7	593	569	0.259053	0.328418	0.00273244	9.77612e-05	27.9502	0.035778	762	42
rs10509928	2	112462093	CA	+	655	0.998476	0.683807	0.107634	520	129	6	592	568	0.258243	0.341054	0.0041083	9.89123e-05	41.5348	0.0240762	1158	43
rs2269873	11	19253401	AG	+	656	1	0.909734	0.221037	397	228	31	593	569	-0.278015	-0.254807	3.79371e-05	9.96345e-05	0.380763	2.62631	24	44
rs2304128	11	19607151	CA	+	656	1	0.617084	0.134909	489	157	10	593	569	-0.349196	-0.310751	2.36536e-05	0.000101035	0.234112	4.27146	16	45
rs10492814	8	70684015	GA	+	656	1	0.313298	0.367378	256	318	82	593	569	0.197507	0.221236	0.000754287	0.000103236	7.30643	0.136866	223	46
rs7638828	16	154900829	GA	+	656	1	0.289401	0.102896	525	127	4	593	569	0.337683	0.352078	0.00030194	0.000106382	2.83827	0.352328	87	47
rs10882005	2	93694444	GA	+	654	0.996951	0.0873958	0.263761	363	237	54	591	567	-0.202373	-0.23617	0.00126295	0.000110508	11.4285	0.0875004	348	48
rs4734443	21	101081597	GA	+	654	0.996951	1	0.479358	177	327	150	593	569	-0.193956	-0.2103	0.000523492	0.0001125	4.65325	0.214903	156	49
rs9481408	19	114371980	GA	+	656	1	0.278728	0.375	263	294	99	593	569	-0.191899	-0.211847	0.000574857	0.00011667	4.9272	0.202955	171	50
rs7249876	11	20880696	GA	+	654	0.996951	0.150345	0.42737	205	339	110	591	567	0.237512	0.211431	2.53037e-05	0.000117686	0.21501	4.65095	18	51
rs10739694	22	129566426	GA	+	656	1	0.638882	0.480945	180	321	155	593	569	-0.197116	-0.206863	0.00033361	0.000118343	2.81901	0.354734	100	52
rs1589066	2	93792202	GA	+	656	1	0.108284	0.264482	363	239	54	593	569	-0.200589	-0.234647	0.00138083	0.000120675	11.4426	0.0873931	392	53
rs10819689	22	101440084	GA	+	655	0.998476	0.5879	0.122137	506	138	11	592	568	0.303974	0.319024	0.000373976	0.000121226	3.08495	0.324155	113	54
rs1380994	21	101154954	GA	+	656	1	0.813606	0.460366	189	330	137	593	569	-0.192908	-0.208749	0.000567618	0.000123199	4.60733	0.217046	169	55
rs2410922	20	101413360	GA	+	656	1	0.257792	0.117378	514	130	12	593	569	-0.362161	-0.316368	1.8523e-05	0.000124714	0.148524	6.73291	12	56
rs6445324	16	63170965	AG	+	655	0.998476	0.690757	0.267939	353	253	49	592	568	0.22224	0.233468	0.000360338	0.000125125	2.87981	0.347245	109	57
rs10936665	16	172141713	AC	+	656	1	0.0596939	0.270579	339	279	38	593	569	0.174602	0.243212	0.00710982	0.000128942	55.1395	0.0181358	2028	58
rs913989	22	129572809	CA	+	656	1	0.935279	0.400915	236	314	106	593	569	-0.201004	-0.21059	0.000354559	0.000129143	2.74547	0.364236	107	59
rs11669114	11	20926209	AC	+	649	0.989329	0.601988	0.128659	494	143	12	587	563	-0.345524	-0.313499	4.14796e-05	0.000129487	0.320339	3.12169	25	60
rs7207933	9	77131682	CA	+	656	1	0.364521	0.3125	315	272	69	593	569	0.190154	0.217604	0.00115765	0.000129584	8.93363	0.111937	321	61
rs1748944	6	95215131	AC	+	656	1	0.00305171	0.1875	445	176	35	593	569	0.259028	0.256337	0.000160241	0.000133796	1.19765	0.834969	54	62
rs10760693	22	101426527	AG	+	624	0.95122	1	0.123397	479	136	9	565	544	0.303123	0.325135	0.000552693	0.000136573	4.04686	0.247105	165	63
rs6797896	16	171521687	AG	+	656	1	0.459014	0.195884	427	201	28	593	569	0.217552	0.26093	0.00177576	0.000137284	12.935	0.0773097	492	64
rs33429	11	35631200	AG	+	655	0.998476	0.91838	0.256489	361	252	42	593	569	-0.211957	-0.237971	0.000939854	0.000141856	6.62539	0.150934	264	65
rs1417633	2	112428515	GA	+	656	1	0.753006	0.145579	480	161	15	593	569	0.225847	0.290451	0.00412148	0.00014201	29.0226	0.034456	1163	66
rs10515720	18	154576460	AG	+	655	0.998476	0.823505	0.226718	390	233	32	592	568	0.268937	0.240327	3.71804e-05	0.000142074	0.261698	3.8212	22	67
rs11791618	22	101524680	AG	+	649	0.989329	0.715189	0.123267	500	138	11	587	564	0.29647	0.315148	0.000531787	0.000144169	3.68862	0.271104	161	68
rs785006	21	128096057	AG	+	656	1	1	0.00304878	652	4	0	593	569	1.78014	1.83944	0.000447559	0.000145764	3.07044	0.325686	133	69
rs7765717	19	91967535	GA	+	656	1	0.420954	0.262957	352	263	41	593	569	0.241393	0.234977	0.000147503	0.000147398	1.00071	0.999291	52	70
rs10760500	22	129576538	AG	+	656	1	0.578272	0.43064	209	329	118	593	569	-0.20324	-0.207536	0.000284652	0.000150721	1.8886	0.529492	82	71
rs1035559	8	70589361	AG	+	654	0.996951	0.610669	0.360092	271	295	88	591	567	0.207458	0.21372	0.000364985	0.000155606	2.34557	0.426335	110	72
rs6793037	16	161930640	AG	+	655	0.998476	1	0.0824427	551	100	4	592	568	0.355411	0.383201	0.000634675	0.000155872	4.07177	0.245594	185	73
rs2442867	2	26066521	AG	+	656	1	0.935694	0.408537	230	316	110	593	569	0.209563	0.21189	0.000251657	0.000157213	1.60073	0.624714	76	74
rs47137	19	134367799	AC	+	641	0.977134	0.863986	0.358034	263	297	81	581	557	-0.183145	-0.214234	0.0017333	0.000159121	10.8929	0.0918027	479	75
rs12228810	4	124106059	AC	+	611	0.931402	0.00134415	0.198036	406	168	37	554	532	-0.268244	-0.259579	0.000140629	0.00016214	0.867333	1.15296	48	76
rs11761211	20	954145	GA	+	650	0.990854	0.187082	0.0353846	606	42	2	588	564	0.512551	0.534006	0.000526255	0.000162525	3.23798	0.308834	158	77
rs1684885	16	171441246	GA	+	655	0.998476	0.811973	0.20687	413	213	29	592	568	0.202767	0.253701	0.00310159	0.000165922	18.693	0.0534958	858	78
rs11151863	10	69270859	GA	+	654	0.996951	0.47958	0.46789	190	316	148	592	568	-0.183954	-0.208127	0.00117044	0.000167247	6.99828	0.142892	323	79
rs297564	21	96248884	AG	+	655	0.998476	0.0395493	0.441985	217	297	141	592	568	0.225514	0.207412	6.79774e-05	0.00017187	0.395515	2.52835	35	80
rs11864453	8	70607981	GA	+	656	1	1	0.371951	259	306	91	593	569	0.21469	0.212595	0.00023065	0.000179238	1.28684	0.7771	70	81
rs12237953	22	101408362	AG	+	644	0.981707	0.443516	0.117236	504	129	11	581	558	0.316115	0.31534	0.000277614	0.000180245	1.54021	0.649263	80	82
rs11195266	2	112443907	GA	+	656	1	0.754618	0.146341	479	162	15	593	569	0.221117	0.283158	0.0045807	0.000180559	25.3696	0.0394173	1277	83
rs1363952	18	64352822	CA	+	638	0.972561	0.517628	0.188088	423	190	25	576	552	-0.232023	-0.257565	0.00099014	0.000189193	5.23349	0.191077	277	84
rs1018374	19	11385892	AG	+	655	0.998476	0.851041	0.118321	508	139	8	592	568	-0.273193	-0.312521	0.00139173	0.000189751	7.33452	0.136342	395	85
rs10985714	22	100078344	AG	+	655	0.998476	0.714125	0.0564885	582	72	1	592	568	0.413145	0.42146	0.000452016	0.000194716	2.32141	0.430772	136	86
rs2052444	6	77382671	GA	+	655	0.998476	0.265463	0.169466	456	176	23	592	568	0.270323	0.272253	0.000304366	0.000195921	1.55351	0.643703	88	87
rs297563	21	96248859	GA	+	656	1	0.0395039	0.442835	217	297	142	593	569	0.222807	0.205075	7.98407e-05	0.000196056	0.407235	2.45559	37	88
rs4836579	22	129568369	AG	+	637	0.971037	1	0.427786	208	313	116	578	554	-0.200811	-0.204791	0.000356936	0.000196942	1.81239	0.551757	108	89
rs10520579	7	81959475	GA	+	655	0.998476	0.791992	0.0816794	553	97	5	592	568	0.376279	0.372412	0.000211387	0.000197005	1.073	0.931964	69	90
rs2479726	19	42006074	GA	+	655	0.998476	0.231369	0.235115	389	224	42	592	568	0.188829	0.233156	0.00337909	0.000209058	16.1634	0.0618681	936	91
rs1435260	22	100086084	GA	+	651	0.992378	0.716613	0.123656	501	139	11	589	565	0.306843	0.298878	0.000242375	0.00021051	1.15137	0.868531	72	92
rs1464564	7	27990121	AC	+	652	0.993902	0.00208332	0.171012	460	161	31	589	565	0.232341	0.259569	0.00131165	0.000210564	6.2292	0.160534	364	93
rs4270125	7	91453238	AC	+	565	0.86128	0.166895	0.187611	378	162	25	516	499	0.272264	0.268134	0.00027917	0.000213138	1.30981	0.763472	81	94
rs1159372	6	23461553	GA	+	655	0.998476	1	0.021374	627	28	0	592	568	0.646392	0.715831	0.00137043	0.00021993	6.23119	0.160483	387	95
rs2127208	18	101013650	AG	+	655	0.998476	0.531796	0.49542	171	319	165	592	568	-0.174065	-0.20065	0.00162699	0.000221874	7.33296	0.136371	457	96
rs2303324	12	31042740	GA	+	653	0.995427	0.525307	0.189893	431	196	26	590	566	-0.228412	-0.271742	0.00236677	0.000223154	10.606	0.0942863	665	97
rs7739977	19	15885649	GA	+	656	1	0.205783	0.124238	499	151	6	593	569	0.313015	0.312805	0.000299426	0.000225384	1.32851	0.752721	86	98
rs3867192	11	20793016	CA	+	656	1	1	0.490854	170	328	158	593	569	-0.222344	-0.196591	5.11373e-05	0.000226391	0.225881	4.42711	27	99
rs2479723	19	41998813	AG	+	656	1	0.231211	0.234756	390	224	42	593	569	0.186723	0.23129	0.00375001	0.000234814	15.9701	0.0626169	1062	100
rs6909	11	19480542	AG	+	656	1	0.76171	0.260671	360	250	46	593	569	-0.24391	-0.227959	0.000140203	0.000237096	0.591334	1.69109	47	101
rs1684881	16	171444954	GA	+	643	0.980183	0.545225	0.203733	410	204	29	580	557	0.194567	0.248624	0.00476163	0.000239231	19.9039	0.0502414	1326	102
rs9980286	14	41883760	AG	+	656	1	1	0.265244	354	256	46	593	569	0.214032	0.224113	0.000678113	0.000240574	2.81873	0.35477	201	103
rs7252981	11	19553579	GA	+	656	1	1	0.238567	380	239	37	593	569	-0.264581	-0.232135	5.1955e-05	0.000248561	0.209024	4.78415	28	104
rs11629506	7	100077066	AG	+	612	0.932927	0.934551	0.437092	193	303	116	554	534	0.176416	0.203714	0.00214145	0.000250545	8.54717	0.116998	595	105
rs4960959	21	87203899	AG	+	656	1	0.267706	0.262957	362	243	51	593	569	-0.227491	-0.220323	0.000243466	0.000250993	0.970011	1.03092	73	106
rs10801555	1	194926884	GA	+	644	0.981707	0.624919	0.407609	229	305	110	583	559	0.157981	0.199264	0.00488282	0.00025245	19.3417	0.0517017	1359	107
rs1562660	12	207013899	AG	+	635	0.967988	1	0.198425	408	202	25	575	551	-0.24293	-0.246435	0.000408128	0.000252953	1.61345	0.61979	120	108
rs6897874	18	78070277	GA	+	655	0.998476	0.434391	0.489313	176	317	162	592	568	-0.20769	-0.198101	0.000179113	0.000253063	0.707778	1.41287	60	109
rs2000999	8	70665594	GA	+	648	0.987805	0.230121	0.20679	413	202	33	585	561	0.222501	0.243205	0.00113803	0.000255212	4.45917	0.224257	314	110
rs393723	11	20779390	GA	+	637	0.971037	0.219569	0.10989	508	118	11	576	552	-0.366595	-0.319375	5.37724e-05	0.000279594	0.192323	5.19958	29	111
rs821639	1	230216466	AG	+	654	0.996951	0.740125	0.380734	253	304	97	591	567	0.163773	0.205089	0.0042395	0.000281871	15.0405	0.066487	1188	112
rs33435	11	35635295	AG	+	656	1	0.217966	0.332317	285	306	65	593	569	-0.184997	-0.210823	0.00181936	0.000287674	6.32437	0.158118	504	113
rs13340461	19	42032256	GA	+	650	0.990854	0.222946	0.23	391	219	40	587	563	0.196613	0.229265	0.00251974	0.000289064	8.71689	0.11472	704	114
rs11191731	2	105320387	CA	+	655	0.998476	0.147486	0.0458015	598	54	3	592	569	-0.399987	-0.437171	0.00146061	0.00028924	5.04981	0.198027	414	115
rs1032844	16	154936374	AG	+	656	1	1	0.127287	499	147	10	593	569	0.265418	0.296047	0.00151966	0.000289449	5.25018	0.19047	431	116
rs6945096	20	150746624	GA	+	655	0.998476	0.803867	0.19542	425	204	26	592	568	0.232278	0.246178	0.00089383	0.000291217	3.0693	0.325807	252	117
rs7150931	6	92207794	AG	+	617	0.940549	0.122219	0.450567	196	286	135	555	531	-0.197974	-0.203558	0.00053492	0.000293128	1.82487	0.547985	162	118
rs10819305	22	129557794	AG	+	656	1	0.807566	0.402439	236	312	108	593	569	0.200186	0.202421	0.000439354	0.000294285	1.49295	0.669813	130	119
rs603261	2	14433239	AG	+	654	0.996951	0.640231	0.298165	319	280	55	591	567	-0.186154	-0.212666	0.0020348	0.000297938	6.82961	0.146421	566	120
rs2192567	12	59310127	CA	+	656	1	0.0184534	0.402439	249	286	121	593	569	0.22293	0.208142	0.000164326	0.00029951	0.548649	1.82266	56	121
rs1653765	12	23582737	AG	+	656	1	0.583389	0.471799	179	335	142	593	569	0.215615	0.205124	0.000209219	0.000303449	0.68947	1.45039	68	122
rs433655	12	86707040	AG	+	655	0.998476	0.0614135	0.251908	376	228	51	592	568	-0.24603	-0.236953	0.000249552	0.000305086	0.817973	1.22253	75	123
rs12666837	20	83639293	GA	+	651	0.992378	0.157978	0.485407	163	344	144	589	565	0.183653	0.198064	0.00107758	0.000306629	3.51429	0.284552	303	124
rs164294	19	94082305	GA	+	655	0.998476	0.750964	0.243511	373	245	37	592	568	0.226189	0.22819	0.000462242	0.000306994	1.5057	0.664141	143	125
rs1057377	17	167892648	GA	+	484	0.737805	0.00954426	0.261364	253	209	22	442	423	-0.203622	-0.263805	0.00646175	0.000314542	20.5434	0.0486775	1825	126
rs2895719	18	100957455	AG	+	656	1	0.481933	0.490854	165	338	153	593	569	-0.169377	-0.200093	0.00274014	0.000315931	8.67324	0.115297	765	127
rs186131	21	96258231	AG	+	656	1	0.152639	0.434451	219	304	133	593	569	0.21693	0.200404	0.000144683	0.000320319	0.451683	2.21394	51	128
rs3828009	13	17566824	AG	+	644	0.981707	0.0756608	0.0745342	555	82	7	581	559	0.378608	0.352442	0.000162811	0.000321127	0.506999	1.97239	55	129
rs778653	16	162198735	AC	+	648	0.987805	0.525901	0.448302	193	329	126	587	564	-0.205555	-0.203981	0.000410898	0.000321355	1.27864	0.782078	122	130
rs2839567	14	42917111	AG	+	654	0.996951	0.147022	0.2263	398	216	40	592	568	-0.223576	-0.230867	0.000721008	0.000326987	2.20501	0.453513	214	131
rs7853400	22	74818780	GA	+	652	0.993902	0.584194	0.312117	305	287	60	590	566	-0.172953	-0.211857	0.00435142	0.000327162	13.3005	0.0751852	1216	132
rs10894690	3	132914950	AG	+	655	0.998476	1	0.010687	641	14	0	592	568	0.928051	0.881974	0.00030865	0.000343673	0.898092	1.11347	89	133
rs7731260	18	107809611	GA	+	656	1	0.0239025	0.369665	247	333	76	593	569	0.177685	0.209885	0.0032353	0.000347161	9.3193	0.107304	903	134
rs2609914	12	30815501	CA	+	652	0.993902	0.132321	0.238497	385	223	44	590	566	0.212636	0.225854	0.000979144	0.000354417	2.76269	0.361966	270	135
rs2186830	10	423431	GA	+	648	0.987805	0.898249	0.189815	426	198	24	587	563	-0.24244	-0.244037	0.000525257	0.000354638	1.48111	0.67517	157	136
rs12468305	12	52552509	GA	+	606	0.92378	0.331159	0.297855	304	243	59	548	525	0.192776	0.211308	0.00136348	0.000356476	3.82489	0.261446	386	137
rs464541	15	16942888	AG	+	655	0.998476	0.902759	0.198473	420	210	25	592	568	-0.207861	-0.235829	0.00226095	0.000363289	6.22355	0.16068	633	138
rs2067038	1	175185298	AC	+	656	1	0.682319	0.256098	365	246	45	593	569	0.201294	0.222015	0.00154215	0.000363559	4.24182	0.235748	436	139
rs4652211	1	175186554	AG	+	656	1	0.682319	0.256098	365	246	45	593	569	0.201294	0.222015	0.00154215	0.000363559	4.24182	0.235748	437	140
rs7525212	1	44802266	CA	+	655	0.998476	0.478474	0.207634	408	222	25	592	568	-0.223442	-0.235703	0.00107443	0.000374803	2.86666	0.348838	300	141
rs6059504	13	31920819	AG	+	656	1	0.39173	0.199695	416	218	22	593	569	-0.254041	-0.247711	0.000399766	0.000387332	1.0321	0.968896	117	142
rs1866967	1	29958249	AG	+	617	0.940549	1.09472e-06	0.384117	263	234	120	561	539	-0.176498	-0.190582	0.00131237	0.000391131	3.35532	0.298035	365	143
rs1008898	20	7240084	CA	+	655	0.998476	0.757111	0.254198	366	245	44	593	569	-0.197504	-0.214809	0.00152053	0.000392598	3.87299	0.258198	432	144
rs2086667	16	158319211	GA	+	652	0.993902	0.257289	0.139571	486	150	16	590	566	0.261984	0.290143	0.00185625	0.000394347	4.70715	0.212443	511	145
rs7993394	5	25897702	GA	+	655	0.998476	0.272775	0.363359	272	290	93	592	568	-0.183965	-0.199359	0.0014792	0.000401519	3.68402	0.271442	423	146
rs13182765	18	67187321	GA	+	655	0.998476	0.68597	0.10916	518	131	6	593	569	-0.293076	-0.303267	0.000721883	0.000411586	1.75391	0.570156	215	147
rs9478595	19	155302130	GA	+	656	1	1	0.0335366	612	44	0	593	569	0.487989	0.55383	0.00183778	0.000413261	4.44702	0.22487	505	148
rs2222447	16	176063520	CA	+	655	0.998476	0.420675	0.263359	351	263	41	592	569	0.235569	0.222484	0.000287209	0.000418033	0.687047	1.4555	84	149
rs1123004	17	166008055	GA	+	656	1	0.514022	0.394817	236	322	98	593	569	0.166623	0.204567	0.00490344	0.000418941	11.7044	0.0854382	1366	150
rs6702883	1	105044603	GA	+	638	0.972561	0.330187	0.336991	286	274	78	578	554	0.181409	0.205596	0.00243101	0.000419826	5.79052	0.172696	686	151
rs3802357	22	129518474	AG	+	645	0.983232	0.581417	0.496899	167	315	163	583	559	0.188848	0.192498	0.000692219	0.000421428	1.64255	0.608808	205	152
rs2019724	1	194941540	GA	+	656	1	0.813335	0.454268	197	322	137	593	569	0.147626	0.19071	0.00835565	0.000422583	19.7728	0.0505746	2374	153
rs10999147	2	71550864	AG	+	653	0.995427	0.153317	0.0918836	535	116	2	590	566	0.305262	0.352736	0.00266733	0.000426567	6.25302	0.159923	748	154
rs8066765	9	72545599	GA	+	651	0.992378	0.632802	0.288018	327	273	51	588	565	-0.202877	-0.211136	0.00105748	0.000428205	2.46957	0.404929	295	155
rs2389257	5	94794502	CA	+	655	0.998476	1	0.385496	247	311	97	592	568	0.191539	0.192526	0.000672471	0.000435396	1.5445	0.647457	198	156
rs2405800	23	9535534	GA	+	656	1	1.82821e-05	0.3125	394	114	148	593	569	-0.202267	-0.174879	6.36313e-05	0.000438899	0.144979	6.89753	33	157
rs7236364	10	32335014	GA	+	656	1	0.565942	0.390244	240	320	96	593	569	0.202462	0.203809	0.000750232	0.000441567	1.69902	0.588574	222	158
rs4274405	7	71100744	GA	+	656	1	0.683199	0.173018	450	185	21	593	569	-0.223458	-0.258963	0.00241775	0.00044946	5.37924	0.1859	682	159

## Sheet: S4b_SE_LDL-C_NoLLT
SNP	Chromosome	Position	Coding	Strand	SampleSize.total	CallRate	p.HWE	Q.2	P.11	P.12	P.22	SampleSize.una	SampleSize.adj	effB.una	effB.adj	P1df.una	P1df.adj	p.ratio.unaBYadj	p.ratio.adjBYuna	SNP.rank.una	SNP.rank.adj
rs10804838	16	171339701	AG	+	655	0.998476	0.876131	0.147328	475	167	13	592	568	0.357542	0.394298	1.19283e-05	1.29957e-06	9.17867	0.108948	7	1
rs10845527	4	12349801	AG	+	656	1	0.655817	0.0480183	595	59	2	593	569	0.523024	0.591163	6.83738e-05	6.89821e-06	9.91181	0.10089	24	2
rs10882023	2	93842643	AG	+	656	1	1	0.26753	352	257	47	593	569	-0.251792	-0.293643	0.00014434	7.47405e-06	19.3121	0.051781	44	4
rs1878424	2	93814060	GA	+	656	1	0.920817	0.266768	353	256	47	593	569	-0.251792	-0.293643	0.00014434	7.47405e-06	19.3121	0.051781	43	3
rs10989286	22	102671324	AG	+	652	0.993902	0.0689733	0.0391104	604	45	3	590	567	-0.637346	-0.608188	4.77686e-06	9.37829e-06	0.509353	1.96328	3	5
rs8111071	11	50999246	AG	+	656	1	1	0.0327744	613	43	0	593	569	0.737523	0.690836	3.63271e-06	1.08085e-05	0.336096	2.97534	1	6
rs1571176	2	93882133	CA	+	655	0.998476	1	0.265649	353	256	46	592	568	-0.24556	-0.286595	0.000211565	1.24674e-05	16.9695	0.0589294	59	7
rs2479726	19	42006074	GA	+	655	0.998476	0.231369	0.235115	389	224	42	592	568	0.242863	0.289688	0.000310548	1.4773e-05	21.0213	0.0475708	94	8
rs6945096	20	150746624	GA	+	655	0.998476	0.803867	0.19542	425	204	26	592	568	0.291233	0.311556	6.63996e-05	1.62002e-05	4.0987	0.24398	22	9
rs2479723	19	41998813	AG	+	656	1	0.231211	0.234756	390	224	42	593	569	0.24037	0.287376	0.000357809	1.72618e-05	20.7284	0.048243	112	10
rs13340461	19	42032256	GA	+	650	0.990854	0.222946	0.23	391	219	40	587	563	0.251796	0.287812	0.000213601	1.87566e-05	11.388	0.0878117	60	11
rs1684885	16	171441246	GA	+	655	0.998476	0.811973	0.20687	413	213	29	592	568	0.260329	0.304954	0.000280615	2.07418e-05	13.529	0.0739155	83	12
rs6772861	16	142901533	GA	+	655	0.998476	0.596886	0.0801527	555	95	5	592	568	0.379971	0.441182	0.000278829	2.30833e-05	12.0792	0.0827866	81	13
rs1684881	16	171444954	GA	+	643	0.980183	0.545225	0.203733	410	204	29	580	557	0.254914	0.301253	0.000400492	2.84339e-05	14.085	0.0709973	122	14
rs12610185	11	19582722	GA	+	656	1	0.857282	0.123476	503	144	9	593	569	-0.406456	-0.371169	6.30145e-06	2.8449e-05	0.2215	4.51468	5	15
rs10513684	16	172206904	GA	+	649	0.989329	0.339287	0.144068	472	167	10	587	563	0.310248	0.348278	0.000224762	2.88009e-05	7.804	0.128139	63	16
rs6797896	16	171521687	AG	+	656	1	0.459014	0.195884	427	201	28	593	569	0.268296	0.304257	0.000227586	2.90258e-05	7.8408	0.127538	64	17
rs10882005	2	93694444	GA	+	654	0.996951	0.0873958	0.263761	363	237	54	591	567	-0.226303	-0.269993	0.000569533	3.23372e-05	17.6123	0.0567785	181	18
rs1589066	2	93792202	GA	+	656	1	0.108284	0.264482	363	239	54	593	569	-0.224944	-0.26896	0.000608047	3.41128e-05	17.8246	0.0561022	194	19
rs11668878	11	51960213	CA	+	656	1	0.100574	0.0777439	561	88	7	593	569	0.458043	0.443982	2.73494e-05	3.90444e-05	0.700467	1.42762	12	20
rs859587	23	128761338	AC	+	656	1	0.0599709	0.0647866	594	39	23	593	569	0.461436	0.417907	5.393e-06	4.4257e-05	0.121856	8.20638	4	21
rs6556861	18	94554256	GA	+	656	1	0.209325	0.466463	195	310	151	593	569	-0.279795	-0.244249	3.87508e-06	5.00641e-05	0.0774024	12.9195	2	22
rs11761211	20	954145	GA	+	650	0.990854	0.187082	0.0353846	606	42	2	588	564	0.592066	0.610409	0.000122818	5.04388e-05	2.435	0.410678	34	23
rs10521801	23	138560533	CA	+	643	0.980183	0.294777	0.172628	485	94	64	580	556	-0.225425	-0.245512	0.000195801	5.37051e-05	3.64585	0.274284	56	24
rs13228415	20	9457316	AG	+	656	1	0.565398	0.161585	463	174	19	593	569	-0.294319	-0.311615	0.000166758	5.43879e-05	3.06608	0.326149	50	25
rs2304130	11	19650528	AG	+	656	1	0.515938	0.140244	487	154	15	593	569	-0.35701	-0.327932	1.85169e-05	6.38945e-05	0.289804	3.4506	10	26
rs2228603	11	19190924	GA	+	649	0.989329	1	0.134823	485	153	11	587	563	-0.377821	-0.340216	1.32299e-05	6.81711e-05	0.194069	5.15282	8	27
rs11630983	7	81980443	GA	+	654	0.996951	0.831701	0.101682	528	119	7	591	567	-0.365991	-0.382507	0.000101619	6.83487e-05	1.48677	0.672599	30	28
rs725264	17	61365090	AG	+	655	0.998476	0.133976	0.332061	301	273	81	593	569	-0.225384	-0.233777	0.000153325	7.51846e-05	2.03932	0.490359	46	29
rs10819689	22	101440084	GA	+	655	0.998476	0.5879	0.122137	506	138	11	592	568	0.321032	0.349334	0.000322647	7.56482e-05	4.2651	0.234461	100	30
rs950997	2	66662655	AG	+	652	0.993902	0.125744	0.0996933	532	110	10	590	566	0.304435	0.362737	0.00101084	7.67721e-05	13.1667	0.075949	330	31
rs2304128	11	19607151	CA	+	656	1	0.617084	0.134909	489	157	10	593	569	-0.372513	-0.33608	1.60636e-05	7.6789e-05	0.209191	4.78031	9	32
rs4474804	11	33996261	AG	+	655	0.998476	0.543898	0.342748	279	303	73	593	569	0.240666	0.24015	8.74736e-05	7.92164e-05	1.10424	0.905604	27	33
rs464541	15	16942888	AG	+	655	0.998476	0.902759	0.198473	420	210	25	592	568	-0.252219	-0.276229	0.000382508	8.5965e-05	4.44957	0.224741	119	34
rs10760693	22	101426527	AG	+	624	0.95122	1	0.123397	479	136	9	565	544	0.319974	0.355705	0.000485053	8.70815e-05	5.5701	0.17953	149	35
rs10759611	22	114723250	AG	+	647	0.98628	0.035454	0.373261	267	277	103	586	562	0.213367	0.229036	0.000299305	9.14823e-05	3.27173	0.305649	90	36
rs11791618	22	101524680	AG	+	649	0.989329	0.715189	0.123267	500	138	11	587	564	0.314172	0.34462	0.000440178	9.28867e-05	4.73887	0.211021	133	37
rs12237953	22	101408362	AG	+	644	0.981707	0.443516	0.117236	504	129	11	581	558	0.335832	0.349411	0.000216783	9.52619e-05	2.27565	0.439435	62	38
rs10733600	22	114726045	AC	+	653	0.995427	0.0973812	0.381317	260	288	105	591	567	0.212437	0.227239	0.000300445	9.67021e-05	3.10691	0.321863	92	39
rs10985573	22	100042689	AG	+	656	1	1	0.0442073	599	56	1	593	569	0.573565	0.538752	4.37249e-05	9.76198e-05	0.44791	2.23259	17	40
rs12228810	4	124106059	AC	+	611	0.931402	0.00134415	0.198036	406	168	37	554	532	-0.308072	-0.284582	2.85399e-05	0.000100917	0.282804	3.53601	14	41
rs7858435	22	93691236	AG	+	654	0.996951	0.30996	0.503058	168	314	172	591	567	0.209147	0.220906	0.00027296	0.000102576	2.66105	0.375791	80	42
rs10415849	11	19366087	GA	+	655	0.998476	0.257277	0.139695	481	165	9	592	568	-0.382423	-0.329133	8.6011e-06	0.000103	0.0835058	11.9752	6	43
rs2609914	12	30815501	CA	+	652	0.993902	0.132321	0.238497	385	223	44	590	566	0.24825	0.260228	0.000237338	0.00010882	2.18101	0.458503	69	44
rs4808199	11	19406099	GA	+	656	1	1	0.182165	438	197	21	593	569	-0.325509	-0.291568	2.10298e-05	0.000111179	0.189153	5.28673	11	45
rs11015696	2	27656549	CA	+	656	1	0.228993	0.0693598	570	81	5	593	569	0.407033	0.430916	0.000324138	0.00011226	2.88739	0.346334	101	46
rs1159372	6	23461553	GA	+	655	0.998476	1	0.021374	627	28	0	592	568	0.730524	0.795244	0.000523661	0.000113365	4.61927	0.216484	162	47
rs7388052	21	29669235	AG	+	656	1	0.491117	0.171494	453	181	22	593	569	-0.312471	-0.307248	0.000100716	0.000116987	0.860912	1.16156	29	48
rs5400	16	172214994	GA	+	653	0.995427	0.289918	0.209801	403	226	24	591	567	0.240109	0.273865	0.000857986	0.000117531	7.30006	0.136985	272	49
rs1552734	20	153854974	AG	+	656	1	0.306208	0.355183	279	288	89	593	569	-0.200867	-0.237639	0.00113676	0.000118347	9.6053	0.104109	372	50
rs9481408	19	114371980	GA	+	656	1	0.278728	0.375	263	294	99	593	569	-0.197057	-0.225056	0.000721131	0.000118544	6.08323	0.164386	233	51
rs2377102	16	185968242	GA	+	650	0.990854	0.740102	0.383846	249	303	98	588	565	0.183934	0.228965	0.00206699	0.000118721	17.4105	0.0574368	629	52
rs464906	18	94633980	GA	+	655	0.998476	1	0.394656	240	313	102	592	568	-0.235367	-0.234857	0.000130643	0.000126454	1.03313	0.967933	40	53
rs2207781	2	83755204	GA	+	652	0.993902	0.513988	0.183282	432	201	19	590	566	0.308516	0.290959	5.44188e-05	0.000134876	0.403474	2.47848	20	54
rs1676945	21	4593817	GA	+	638	0.972561	0.576752	0.17163	440	177	21	577	554	-0.24915	-0.285544	0.000897498	0.00013733	6.53533	0.153015	288	55
rs13862	5	41039705	AG	+	654	0.996951	1	0.00382263	649	5	0	592	568	1.69119	1.71357	0.000237582	0.000142412	1.66827	0.599424	70	56
rs968525	11	19320215	GA	+	654	0.996951	0.692506	0.181193	440	191	23	591	567	-0.316855	-0.283831	2.82384e-05	0.000142469	0.198208	5.04522	13	57
rs12871476	5	94789264	GA	+	656	1	1	0.259146	360	252	44	593	569	0.247466	0.248215	0.000178162	0.000147858	1.20495	0.82991	53	58
rs10239794	20	153836827	AG	+	656	1	0.303662	0.443598	196	338	122	593	569	-0.183045	-0.223745	0.00205981	0.000160349	12.8458	0.0778462	627	59
rs2747161	19	68379573	GA	+	655	0.998476	0.402866	0.300763	325	266	64	592	568	0.230369	0.240811	0.000315771	0.000161841	1.95112	0.512526	99	60
rs33430	11	35631283	GA	+	653	0.995427	0.923116	0.281776	336	266	51	591	567	-0.228763	-0.241874	0.000410965	0.00016478	2.49402	0.40096	125	61
rs33431	11	35631829	AG	+	656	1	0.84743	0.282774	336	269	51	593	569	-0.227201	-0.240977	0.000448619	0.000173464	2.58623	0.386663	136	62
rs6782678	16	65692467	CA	+	642	0.978659	0.0273572	0.290498	335	241	66	580	560	0.204448	0.236009	0.00135906	0.000174981	7.76689	0.128752	434	63
rs2389257	5	94794502	CA	+	655	0.998476	1	0.385496	247	311	97	592	568	0.214474	0.217886	0.000266858	0.000181423	1.47092	0.679848	76	64
rs16962149	11	34036795	AG	+	656	1	1	0.0251524	623	33	0	593	569	0.758434	0.700067	4.18061e-05	0.00018367	0.227615	4.39339	16	65
rs7882088	23	95642781	GA	+	650	0.990854	0.507034	0.14	519	80	51	587	563	0.283732	0.264328	8.00764e-05	0.000185107	0.432594	2.31163	25	66
rs310199	1	65122710	AG	+	656	1	0.617395	0.372713	261	301	94	593	569	0.218645	0.22192	0.000257313	0.00018611	1.38258	0.723283	73	67
rs2326809	19	6557256	AG	+	650	0.990854	0.307384	0.488462	163	339	148	587	563	-0.207782	-0.219336	0.000437341	0.000192937	2.26676	0.441159	129	68
rs10508011	5	94791351	GA	+	654	0.996951	0.902602	0.199541	418	211	25	591	567	0.2728	0.26153	0.000124289	0.000197078	0.630663	1.58563	37	69
rs10518312	17	120160960	AG	+	654	0.996951	0.318831	0.109327	516	133	5	591	568	-0.355424	-0.350621	0.000210267	0.000197368	1.06536	0.938653	58	70
rs6685931	1	195133856	AG	+	650	0.990854	0.0638683	0.416154	233	293	124	587	563	0.179902	0.212276	0.00188774	0.000199092	9.48177	0.105466	573	71
rs10748848	2	105511695	GA	+	647	0.98628	0.797301	0.188563	427	196	24	584	560	-0.244184	-0.275902	0.00106615	0.000199603	5.34137	0.187218	351	72
rs751029	12	23362371	GA	+	656	1	0.000353966	0.182165	453	167	36	593	569	-0.301249	-0.285607	0.000106145	0.000202516	0.52413	1.90792	31	73
rs11026371	3	21982348	AG	+	656	1	0.848576	0.286585	335	266	55	593	569	0.210667	0.234241	0.000983334	0.000210751	4.66585	0.214323	318	74
rs11026390	3	22021842	AG	+	656	1	0.848576	0.286585	335	266	55	593	569	0.210667	0.234241	0.000983334	0.000210751	4.66585	0.214323	319	75
rs2951967	21	101839938	AG	+	656	1	0.331726	0.201982	422	203	31	593	569	0.250123	0.258481	0.00037897	0.000216838	1.74771	0.572179	117	77
rs2978092	21	101839424	AG	+	656	1	0.331726	0.201982	422	203	31	593	569	0.250123	0.258481	0.00037897	0.000216838	1.74771	0.572179	116	76
rs1457893	3	22012627	AG	+	654	0.996951	0.774102	0.285933	335	264	55	591	567	0.209962	0.233815	0.00103033	0.000218589	4.71352	0.212156	334	78
rs8108647	11	19288623	AG	+	656	1	1	0.183689	437	197	22	593	569	-0.30824	-0.274142	4.16025e-05	0.000218639	0.19028	5.25542	15	79
rs2086667	16	158319211	GA	+	652	0.993902	0.257289	0.139571	486	150	16	590	566	0.287706	0.321189	0.00110713	0.000225109	4.91822	0.203326	367	80
rs2818113	19	68398350	GA	+	656	1	0.472656	0.31936	308	277	71	593	569	0.214846	0.230523	0.000637619	0.000228791	2.7869	0.358821	203	81
rs8046201	8	8761488	GA	+	656	1	0.0723346	0.139482	480	169	7	593	569	0.304124	0.311467	0.000325116	0.000229268	1.41806	0.705188	102	82
rs4842008	22	137622530	AG	+	656	1	0.644426	0.215701	401	227	28	593	569	-0.267183	-0.256891	0.000148847	0.000234743	0.634084	1.57708	45	83
rs1535260	19	88950229	GA	+	656	1	0.347085	0.35061	282	288	86	593	569	0.218573	0.219253	0.000295766	0.000237086	1.2475	0.801601	89	84
rs10401193	11	19452066	AG	+	652	0.993902	0.792652	0.182515	434	198	20	589	565	-0.314001	-0.278615	4.46746e-05	0.000240125	0.186048	5.37497	18	85
rs1435260	22	100086084	GA	+	651	0.992378	0.716613	0.123656	501	139	11	589	565	0.329099	0.314583	0.000161679	0.000244301	0.661801	1.51103	48	86
rs1028656	22	100692494	GA	+	655	0.998476	0.126546	0.0442748	600	52	3	592	568	0.478167	0.491175	0.00049429	0.000247118	2.00022	0.499944	150	87
rs1748944	6	95215131	AC	+	656	1	0.00305171	0.1875	445	176	35	593	569	0.260476	0.261585	0.000283872	0.00024725	1.14812	0.870992	85	88
rs310247	1	65079997	AG	+	656	1	0.637874	0.460366	194	320	142	593	569	-0.207033	-0.207434	0.000291188	0.000248024	1.17403	0.851766	87	89
rs7731260	18	107809611	GA	+	656	1	0.0239025	0.369665	247	333	76	593	569	0.203664	0.2286	0.00122596	0.000248404	4.93535	0.20262	397	90
rs7837655	21	144496622	AC	+	656	1	0.0405716	0.108232	527	116	13	593	569	-0.314092	-0.32533	0.000517604	0.000254009	2.03773	0.490741	159	91
rs9294774	19	68543635	GA	+	655	0.998476	0.633862	0.28626	336	263	56	592	568	0.217804	0.233797	0.00068391	0.000254333	2.68903	0.371881	222	92
rs965197	15	23740266	GA	+	656	1	0.250177	0.329268	288	304	64	593	569	-0.234122	-0.227581	0.00017194	0.000254694	0.675085	1.48129	51	93
rs10988593	22	131909165	GA	+	654	0.996951	0.254004	0.220183	403	214	37	591	567	0.224853	0.25026	0.00119734	0.000259448	4.61496	0.216687	385	94
rs2395988	21	131121585	AG	+	655	0.998476	0.0787512	0.425954	227	298	130	592	568	0.206002	0.207847	0.000342375	0.000260275	1.31544	0.760203	109	95
rs6586704	21	18064976	AG	+	655	0.998476	1	0.341221	284	295	76	592	568	0.186475	0.223583	0.00250766	0.000261058	9.60574	0.104104	749	96
rs512577	3	125597151	GA	+	606	0.92378	0.144893	0.29703	307	238	61	549	525	-0.218882	-0.22901	0.000582136	0.000266402	2.18517	0.457629	183	97
rs2012061	9	65242845	AG	+	655	0.998476	1	0.021374	627	28	0	592	568	-0.821711	-0.74943	6.33874e-05	0.000269917	0.23484	4.25822	21	98
rs1320594	1	53382960	CA	+	655	0.998476	0.810643	0.426718	217	317	121	592	568	0.197628	0.209089	0.000625504	0.000271723	2.30199	0.434406	200	99
rs12192181	19	15856451	CA	+	656	1	0.154058	0.125	498	152	6	593	569	0.344563	0.326908	0.000131762	0.000275173	0.478835	2.0884	41	100
rs2239371	11	18805025	AG	+	612	0.932927	0.826975	0.243464	349	228	35	550	529	-0.263246	-0.247755	0.000129944	0.000276264	0.470363	2.12602	39	101
rs1711782	5	58999739	GA	+	656	1	0.000490382	0.257622	379	216	61	593	569	-0.227776	-0.232391	0.000431828	0.000283238	1.52461	0.655906	127	102
rs7236364	10	32335014	GA	+	656	1	0.565942	0.390244	240	320	96	593	569	0.217557	0.223903	0.000535023	0.00028331	1.88847	0.529529	164	103
rs7252981	11	19553579	GA	+	656	1	1	0.238567	380	239	37	593	569	-0.276931	-0.244587	5.07092e-05	0.000283396	0.178934	5.58865	19	104
rs2192567	12	59310127	CA	+	656	1	0.0184534	0.402439	249	286	121	593	569	0.238275	0.222039	0.000120889	0.000286669	0.421701	2.37135	33	105
rs7207933	9	77131682	CA	+	656	1	0.364521	0.3125	315	272	69	593	569	0.199964	0.21927	0.00106222	0.000287227	3.6982	0.270402	350	106
rs266580	18	64347298	AG	+	656	1	0.674993	0.368902	264	300	92	593	569	-0.207394	-0.218925	0.000649058	0.000287962	2.25397	0.443661	210	107
rs964863	19	162079001	AG	+	656	1	1	0.258384	361	251	44	593	569	0.260677	0.249298	0.000161018	0.000291511	0.552358	1.81042	47	108
rs1866967	1	29958249	AG	+	617	0.940549	1.09472e-06	0.384117	263	234	120	561	539	-0.177223	-0.207026	0.00202	0.000292111	6.91518	0.144609	616	109
rs1653765	12	23582737	AG	+	656	1	0.583389	0.471799	179	335	142	593	569	0.226792	0.218668	0.000195679	0.000293276	0.667216	1.49876	55	110
rs1309546	18	64325760	AG	+	654	0.996951	0.738546	0.373089	259	302	93	591	567	-0.208513	-0.218905	0.000616452	0.000293605	2.09959	0.476283	195	111
rs754499	7	58923497	AC	+	588	0.896341	0.457053	0.471088	169	284	135	537	518	-0.189658	-0.210123	0.00112683	0.000293706	3.8366	0.260647	369	112
rs2140825	16	171473104	AG	+	655	0.998476	0.323072	0.319847	297	297	61	592	568	-0.211247	-0.230184	0.000944279	0.000295068	3.20021	0.31248	300	113
rs12674781	21	1365322	GA	+	656	1	0.598644	0.127287	501	143	12	593	569	0.28541	0.310675	0.000995091	0.00029835	3.33532	0.299822	325	114
rs47137	19	134367799	AC	+	641	0.977134	0.863986	0.358034	263	297	81	581	557	-0.186072	-0.217554	0.00229715	0.000310718	7.39302	0.135263	700	115
rs8066765	9	72545599	GA	+	651	0.992378	0.632802	0.288018	327	273	51	588	565	-0.21363	-0.229871	0.000970926	0.000311098	3.12097	0.320414	311	116
rs3783438	6	23078390	AG	+	656	1	0.687508	0.176829	446	188	22	593	569	0.218661	0.266668	0.00345555	0.000317916	10.8694	0.0920016	1022	117
rs10823837	2	73168916	GA	+	655	0.998476	0.390273	0.49084	164	339	152	592	568	0.202849	0.205787	0.000462689	0.000324702	1.42496	0.701773	139	118
rs7525212	1	44802266	CA	+	655	0.998476	0.478474	0.207634	408	222	25	592	568	-0.237617	-0.253159	0.000864588	0.000327137	2.64289	0.378374	276	119
rs6913540	19	68565783	AG	+	656	1	0.568738	0.287348	336	263	57	593	569	0.210651	0.228703	0.000992249	0.000334374	2.96748	0.336986	324	120
rs17421246	21	101331239	AG	+	656	1	0.0252349	0.278963	353	240	63	593	569	0.240709	0.231494	0.000232574	0.000334596	0.69509	1.43866	67	121
rs2442867	2	26066521	AG	+	656	1	0.935694	0.408537	230	316	110	593	569	0.21508	0.213839	0.000328857	0.000334945	0.981822	1.01851	104	122
rs843319	19	20243804	AG	+	632	0.963415	0.222263	0.351266	273	274	85	570	549	0.253087	0.224856	6.76049e-05	0.00033562	0.201433	4.96443	23	123
rs3212692	18	52405421	GA	+	655	0.998476	0.62724	0.0435115	598	57	0	592	568	-0.506533	-0.509327	0.000441317	0.000338974	1.30192	0.768097	134	124
rs12617790	12	31044277	AG	+	656	1	0.808061	0.20122	417	214	25	593	569	-0.231016	-0.266903	0.00205805	0.000340891	6.03726	0.165638	626	125
rs1433611	18	64296417	AG	+	656	1	0.802641	0.373476	259	304	93	593	569	-0.206548	-0.216313	0.000687571	0.000342885	2.00525	0.498691	223	126
rs2141641	21	5840248	AG	+	655	0.998476	0.623118	0.273282	343	266	46	592	568	0.233628	0.236125	0.000434079	0.000346441	1.25296	0.798108	128	127
rs504022	14	43555566	CA	+	656	1	0.304337	0.023628	626	29	1	593	569	0.539014	0.695741	0.00478928	0.000347745	13.7724	0.072609	1422	129
rs546428	14	43552782	GA	+	656	1	0.287668	0.0228659	627	28	1	593	569	0.539014	0.695741	0.00478928	0.000347745	13.7724	0.072609	1421	128
rs2481962	5	27429385	AG	+	656	1	6.35024e-05	0.230945	407	195	54	593	569	-0.188202	-0.231228	0.00410901	0.000348551	11.7888	0.0848261	1213	130
rs7015086	21	1431699	GA	+	656	1	0.0355468	0.196646	432	190	34	593	569	0.24309	0.248201	0.000547448	0.000352724	1.55206	0.644306	168	131
rs230284	1	40031580	GA	+	655	0.998476	0.0282176	0.477863	164	356	135	592	568	-0.220333	-0.21471	0.000247343	0.00035318	0.700333	1.42789	72	132
rs914408	22	137303340	AG	+	656	1	0.0927117	0.367378	252	326	78	593	569	0.19264	0.211899	0.00128757	0.000357709	3.5995	0.277816	416	133
rs1864616	16	30640232	GA	+	649	0.989329	0.345808	0.249615	370	234	45	586	562	0.24367	0.229691	0.000174279	0.000360813	0.483017	2.07032	52	134
rs12248205	2	73176520	CA	+	656	1	0.389999	0.489329	165	340	151	593	569	0.197039	0.20309	0.000646525	0.000363958	1.77637	0.562946	207	135
rs1433870	10	36246789	GA	+	656	1	0.239124	0.462652	197	311	148	593	569	-0.214483	-0.199446	0.000143687	0.000366774	0.391758	2.5526	42	136
rs6924490	19	6145874	GA	+	656	1	0.649112	0.150152	475	165	16	593	569	-0.279478	-0.286597	0.000522999	0.000366775	1.42594	0.701291	161	137
rs1380994	21	101154954	GA	+	656	1	0.813606	0.460366	189	330	137	593	569	-0.186415	-0.205966	0.00143327	0.000367301	3.90218	0.256267	449	138
rs7739977	19	15885649	GA	+	656	1	0.205783	0.124238	499	151	6	593	569	0.337545	0.321169	0.000189258	0.000368782	0.513198	1.94857	54	139
rs1986391	23	99438936	AG	+	656	1	1	0.0907012	567	59	30	593	569	-0.292198	-0.292301	0.000507185	0.000369715	1.37183	0.728955	154	140
rs4238458	7	71037538	AG	+	654	0.996951	0.718061	0.123853	503	140	11	591	567	-0.269045	-0.31779	0.00229363	0.00037371	6.13744	0.162934	696	141
rs3764312	8	70683234	AC	+	628	0.957317	0.210802	0.29379	320	247	61	570	548	0.195084	0.224809	0.00223597	0.000375286	5.95803	0.167841	677	142
rs11079297	9	52845140	GA	+	656	1	0.130515	0.191311	435	191	30	593	569	-0.26813	-0.258225	0.000283985	0.0003809	0.745562	1.34127	86	143
rs7388381	21	18026157	GA	+	653	0.995427	0.761247	0.261103	358	249	46	590	566	0.214798	0.230639	0.000907316	0.000381189	2.38023	0.420128	290	144
rs4077549	1	212745887	GA	+	656	1	0.0145795	0.0571646	587	63	6	593	569	-0.372945	-0.433838	0.00188859	0.000381475	4.95077	0.201989	574	145
rs2747160	19	68379380	AG	+	656	1	0.354572	0.300305	326	266	64	593	569	0.216627	0.225885	0.000681491	0.000385493	1.76784	0.565661	220	146
rs1509408	7	54073605	AC	+	656	1	0.187804	0.158537	469	166	21	593	569	-0.275294	-0.276767	0.000461654	0.000387454	1.19151	0.839273	138	147
rs1653752	12	23574309	GA	+	655	0.998476	0.583946	0.473282	178	334	143	592	568	0.218849	0.215355	0.000344617	0.00038907	0.885747	1.12899	110	148
rs10873406	6	90791814	AC	+	656	1	0.160634	0.166159	461	172	23	593	569	0.249383	0.277754	0.00152075	0.000399186	3.80962	0.262493	474	149
rs4398608	18	10900970	CA	+	566	0.862805	0.129052	0.472615	148	301	117	510	488	-0.245226	-0.222354	8.01471e-05	0.000400389	0.200173	4.99568	26	150
rs1386200	19	72382839	AG	+	655	0.998476	0.000169604	0.129771	508	124	23	593	569	-0.307248	-0.29617	0.000311258	0.000400467	0.777239	1.28661	96	151
rs6793037	16	161930640	AG	+	655	0.998476	1	0.0824427	551	100	4	592	568	0.355664	0.381142	0.0010515	0.000404864	2.59718	0.385034	345	152
rs2700799	21	5810811	AG	+	655	0.998476	0.479693	0.262595	352	262	41	592	568	0.242634	0.236557	0.000300509	0.000409527	0.733796	1.36278	93	153
rs2194633	10	68895144	AG	+	655	0.998476	0.000290614	0.457252	216	279	160	592	568	-0.165859	-0.198126	0.00343388	0.000410962	8.3557	0.119679	1011	154
rs1029340	21	18020166	GA	+	654	0.996951	0.770888	0.279817	341	260	53	591	567	0.221791	0.224067	0.000543419	0.000414999	1.30945	0.763681	167	155
rs10095649	21	135234130	AG	+	655	0.998476	0.544997	0.151908	473	165	17	592	568	0.301346	0.288574	0.000279005	0.000415678	0.671205	1.48986	82	156
rs2186830	10	423431	GA	+	648	0.987805	0.898249	0.189815	426	198	24	587	563	-0.248923	-0.256228	0.000642938	0.000421095	1.52683	0.654954	206	157
rs11890390	12	54339186	GA	+	656	1	0.561432	0.212652	409	215	32	593	569	0.273067	0.259266	0.000213956	0.000422354	0.506578	1.97403	61	158
rs3784595	7	29129507	AG	+	655	0.998476	0.320761	0.164122	461	173	21	592	568	-0.202921	-0.266619	0.00763973	0.000423383	18.0445	0.0554187	2267	159

## Sheet: S4c_SE_HDL-C_NoLLT
SNP	Chromosome	Position	Coding	Strand	SampleSize.total	CallRate	p.HWE	Q.2	P.11	P.12	P.22	SampleSize.una	SampleSize.adj	effB.una	effB.adj	P1df.una	P1df.adj	p.ratio.unaBYadj	p.ratio.adjBYuna	SNP.rank.una	SNP.rank.adj
rs2292883	12	238107739	GA	+	656	1	1	0.0205793	629	27	0	593	569	0.721273	0.848303	0.000114953	9.60109e-06	11.9729	0.0835217	35	1
rs3736495	7	66400544	CA	+	656	1	1	0.129573	497	148	11	593	569	0.358674	0.360842	1.88524e-05	1.62031e-05	1.16351	0.85947	5	2
rs2111485	12	162818782	GA	+	656	1	0.584605	0.501524	159	336	161	593	569	0.249659	0.251551	2.5192e-05	1.8588e-05	1.35528	0.737854	7	3
rs2225192	22	81122761	AG	+	654	0.996951	0.109267	0.324924	307	269	78	591	567	0.281192	0.257933	5.31942e-06	1.91466e-05	0.277826	3.59938	1	4
rs1532624	8	55562980	CA	+	653	0.995427	0.7993	0.359877	269	298	86	590	566	0.25853	0.256563	1.79853e-05	2.26361e-05	0.794539	1.25859	4	5
rs1363602	18	169539456	GA	+	656	1	0.0892012	0.183689	444	183	29	593	569	0.262214	0.306822	0.000404853	2.4375e-05	16.6093	0.0602071	110	6
rs1109850	14	34151763	CA	+	655	0.998476	0.815323	0.212214	405	222	28	592	568	0.269371	0.286612	7.61052e-05	2.48843e-05	3.05837	0.326972	17	7
rs1510064	18	83778908	AG	+	655	0.998476	0.541134	0.107634	523	123	9	593	569	0.32393	0.393589	0.000702776	2.49302e-05	28.1898	0.0354739	190	8
rs1452134	3	85811064	AG	+	652	0.993902	0.278967	0.273773	338	271	43	589	565	0.28184	0.275351	1.67397e-05	2.89594e-05	0.578039	1.72999	2	9
rs2301908	20	73758950	AG	+	639	0.974085	1	0.029734	601	38	0	576	552	0.644609	0.689614	7.64128e-05	3.17052e-05	2.4101	0.41492	18	10
rs725882	17	122787772	GA	+	648	0.987805	0.0045363	0.16821	459	160	29	586	562	0.294754	0.313109	0.000110618	3.42565e-05	3.22911	0.309683	32	11
rs716473	17	151949674	AC	+	656	1	0.0191936	0.410061	243	288	125	593	569	-0.246526	-0.255799	0.00012344	4.18419e-05	2.95015	0.338966	38	12
rs4242698	22	27114745	AC	+	655	0.998476	0.0855747	0.238168	372	254	29	592	568	-0.252223	-0.286208	0.00031511	4.67011e-05	6.74737	0.148206	90	13
rs669775	3	87444947	AG	+	656	1	0.0498352	0.275152	355	241	60	593	569	0.219141	0.251442	0.000526223	5.27474e-05	9.97628	0.100238	135	14
rs4924410	7	38126786	CA	+	651	0.992378	0.230256	0.235023	375	246	30	588	564	0.24845	0.276978	0.000254563	5.36937e-05	4.74103	0.210925	75	15
rs9507299	5	23757190	GA	+	654	0.996951	0.51918	0.413609	229	309	116	591	567	-0.2087	-0.235701	0.000402999	5.39707e-05	7.46699	0.133923	108	16
rs9696070	22	88420599	GA	+	656	1	0.181736	0.373476	249	324	83	593	569	0.209179	0.244681	0.000625971	5.54737e-05	11.2841	0.0886202	172	17
rs4315319	8	60283705	AG	+	656	1	0.29432	0.33689	282	306	68	593	569	0.203317	0.255127	0.00140549	5.69697e-05	24.6708	0.0405337	403	18
rs7231577	10	7568782	GA	+	655	0.998476	0.462765	0.0572519	583	69	3	592	568	0.413589	0.518572	0.000844066	6.0277e-05	14.0031	0.0714127	236	19
rs12978630	11	34784968	AG	+	654	0.996951	0.335123	0.417431	228	306	120	592	568	-0.23621	-0.238074	9.58228e-05	6.07527e-05	1.57726	0.634011	27	20
rs187726	8	53846275	AG	+	656	1	0.109727	0.219512	407	210	39	593	569	0.285338	0.275278	4.26956e-05	6.08522e-05	0.701627	1.42526	8	21
rs2409809	21	11584559	GA	+	654	0.996951	0.685285	0.261468	359	248	47	591	567	-0.233951	-0.261068	0.000411078	6.42807e-05	6.39504	0.156371	112	22
rs984971	12	162932767	AG	+	656	1	0.749919	0.427591	217	317	122	593	569	0.22828	0.234731	0.000136125	6.59694e-05	2.06346	0.484624	39	23
rs11021927	3	11533125	CA	+	653	0.995427	0.862711	0.343798	280	297	76	590	567	-0.236399	-0.240409	8.72257e-05	6.85513e-05	1.27242	0.785907	24	24
rs888274	12	163045895	GA	+	656	1	0.0236384	0.370427	246	334	76	593	569	0.23599	0.243737	0.000120395	7.26803e-05	1.6565	0.603683	36	25
rs379439	18	53038540	AC	+	649	0.989329	1	0.285824	331	265	53	587	564	-0.217247	-0.254955	0.000751114	7.50201e-05	10.0122	0.0998785	211	26
rs7608315	12	162921969	CA	+	653	0.995427	0.37238	0.406585	224	327	102	591	568	-0.221188	-0.233745	0.000200565	7.77111e-05	2.58091	0.387461	58	27
rs7261862	13	33579696	AG	+	656	1	0.530803	0.105183	523	128	5	593	569	-0.361412	-0.369904	9.02319e-05	8.01861e-05	1.12528	0.888668	25	28
rs7144752	6	19588771	AG	+	604	0.920732	0.790069	0.0844371	505	96	3	546	526	0.462249	0.42469	1.78564e-05	8.18156e-05	0.218252	4.58186	3	29
rs2387400	7	90359238	CA	+	656	1	1	0.260671	358	254	44	593	569	0.239322	0.246162	0.000114799	8.23391e-05	1.39422	0.717246	34	30
rs4939826	10	44707404	CA	+	655	0.998476	0.240386	0.0717557	562	92	1	593	569	0.417692	0.450323	0.000263455	8.30207e-05	3.17336	0.315123	77	31
rs1861881	22	118352077	CA	+	655	0.998476	0.40373	0.249618	373	237	45	592	568	0.213668	0.255362	0.00103835	8.35749e-05	12.4242	0.0804881	296	32
rs7768480	19	132245125	AG	+	651	0.992378	0.00236383	0.0698925	569	73	9	588	564	0.433072	0.409858	2.45542e-05	8.57733e-05	0.286269	3.49322	6	33
rs10967750	22	27156159	AG	+	655	0.998476	0.0390487	0.218321	391	242	22	592	568	-0.269832	-0.285529	0.000194411	8.73909e-05	2.22462	0.449516	52	34
rs4634366	18	169523385	GA	+	656	1	0.857032	0.317073	307	282	67	593	569	-0.216851	-0.239438	0.000439961	9.63221e-05	4.5676	0.218933	120	35
rs6898878	18	18448233	GA	+	651	0.992378	0.204046	0.12212	498	147	6	589	565	0.357523	0.354605	7.50179e-05	9.64516e-05	0.777778	1.28571	16	36
rs8088250	10	52128915	AG	+	647	0.98628	0.414193	0.260433	358	241	48	585	561	0.227343	0.253594	0.000511744	9.897e-05	5.1707	0.193397	131	37
rs1459498	10	52150313	AG	+	656	1	0.689674	0.265244	356	252	48	593	569	0.22845	0.252841	0.00047074	0.000100135	4.70104	0.212719	126	38
rs4831335	21	15344512	AG	+	606	0.92378	0.0498095	0.0816832	515	83	8	547	525	0.358648	0.39178	0.000293661	0.000102492	2.86521	0.349015	84	39
rs2636993	18	52965553	GA	+	656	1	1	0.28811	332	270	54	593	569	-0.213932	-0.248326	0.00085152	0.000104967	8.11227	0.12327	238	40
rs6590359	3	128311024	AC	+	635	0.967988	0.000274181	0.0551181	573	54	8	575	551	-0.387206	-0.428107	0.000518084	0.000107386	4.8245	0.207275	132	41
rs4978881	22	111987757	GA	+	656	1	1	0.315549	307	284	65	593	569	0.240614	0.239048	9.89235e-05	0.000109511	0.903317	1.10703	28	42
rs7849719	22	81143818	GA	+	655	0.998476	0.00501993	0.225191	406	203	46	592	568	0.271626	0.264374	8.12149e-05	0.000112469	0.722111	1.38483	19	43
rs2113070	18	94287596	CA	+	654	0.996951	0.0617041	0.0810398	556	90	8	591	567	-0.414349	-0.409633	0.000123004	0.000114562	1.07369	0.931366	37	44
rs1046088	15	39904329	AC	+	656	1	1	0.0190549	631	25	0	593	569	0.771971	0.775337	0.000107241	0.000120164	0.892457	1.1205	30	45
rs12596987	8	48099190	GA	+	654	0.996951	0.203178	0.243884	380	229	45	591	567	0.250027	0.252553	0.000199973	0.000125075	1.59882	0.62546	57	46
rs1822163	18	112078960	AG	+	656	1	0.26823	0.0396341	606	48	2	593	569	0.520625	0.54682	0.000278368	0.000125563	2.21696	0.451068	79	47
rs7048294	22	88609667	AG	+	656	1	0.235625	0.23628	388	226	42	593	569	-0.241569	-0.254157	0.00035472	0.000131321	2.70117	0.37021	94	48
rs10868142	22	86111435	GA	+	655	0.998476	0.536289	0.147328	478	161	16	592	568	0.239748	0.303417	0.0025213	0.000134017	18.8132	0.053154	747	49
rs365578	18	52973566	CA	+	650	0.990854	0.923742	0.286923	331	265	54	587	563	-0.214747	-0.244918	0.000833409	0.000135427	6.15396	0.162497	234	50
rs2692759	2	7242937	GA	+	656	1	0.558417	0.035061	611	44	1	593	569	0.570877	0.570869	0.000199357	0.000135641	1.46975	0.680389	55	51
rs1782644	2	80671181	AG	+	654	0.996951	0.505221	0.0634557	572	81	1	591	568	0.423953	0.434992	0.000204982	0.000135685	1.51072	0.661934	61	52
rs905155	18	169406903	AC	+	654	0.996951	0.689486	0.424312	214	325	115	591	567	-0.204213	-0.227263	0.00068963	0.000138186	4.9906	0.200377	187	53
rs1338634	1	162772813	GA	+	656	1	0.179661	0.0807927	557	92	7	593	569	0.417476	0.397145	7.22913e-05	0.000139749	0.517294	1.93314	13	54
rs4333986	3	90711068	GA	+	655	0.998476	0.0138244	0.161832	469	160	26	592	568	0.279067	0.286307	0.00025444	0.000139791	1.82014	0.549408	74	55
rs12283371	3	11596491	GA	+	656	1	0.937707	0.487805	171	330	155	593	569	0.19838	0.217901	0.000618337	0.000148214	4.17191	0.239698	168	56
rs4978890	22	112006961	AG	+	653	0.995427	0.665431	0.346095	282	290	81	591	567	0.209006	0.224356	0.000430144	0.000149426	2.87864	0.347386	117	57
rs807571	12	15726560	GA	+	656	1	1	0.241616	377	241	38	593	569	0.270345	0.259223	7.09274e-05	0.000152669	0.464582	2.15247	12	58
rs1400784	7	90357095	AG	+	656	1	0.92824	0.317835	306	283	67	593	569	0.232602	0.224538	8.5217e-05	0.000155242	0.54893	1.82173	23	59
rs6987329	21	18660656	AG	+	625	0.952744	1	0.1712	429	178	18	565	541	0.256859	0.287503	0.00053819	0.000155791	3.45456	0.289473	140	60
rs717216	10	37132113	GA	+	656	1	1	0.123476	504	142	10	593	569	0.34084	0.331072	0.000105685	0.000163516	0.646329	1.5472	29	61
rs765878	19	5601274	AG	+	655	0.998476	0.542835	0.341221	288	287	80	592	568	0.199832	0.228444	0.000926695	0.000163601	5.66438	0.176542	266	62
rs9949102	10	42382046	GA	+	655	0.998476	0.335203	0.171756	453	179	23	593	569	-0.243879	-0.279823	0.00090177	0.000163659	5.51006	0.181486	260	63
rs9409933	22	137384232	CA	+	652	0.993902	0.501029	0.368098	256	312	84	590	566	0.21888	0.229561	0.000364056	0.000165114	2.20488	0.453539	98	64
rs1393703	21	772845	AG	+	655	0.998476	0.827095	0.233588	386	232	37	592	569	-0.260608	-0.260418	0.000199597	0.000168021	1.18793	0.841801	56	65
rs4944574	3	85799105	GA	+	656	1	0.220473	0.25686	356	263	37	593	569	0.252252	0.253527	0.000174803	0.000170855	1.02311	0.977414	47	66
rs30977	8	53859055	GA	+	655	0.998476	0.189645	0.233588	391	222	42	592	568	0.271269	0.253025	6.80372e-05	0.000173123	0.392999	2.54453	11	67
rs3764261	8	55550825	CA	+	651	0.992378	0.362933	0.263441	358	243	50	588	564	0.251835	0.244697	0.00013938	0.000175324	0.794986	1.25788	40	68
rs2075302	12	162784392	AG	+	617	0.940549	0.130503	0.346029	255	297	65	557	535	-0.214533	-0.241677	0.000800175	0.000179529	4.45707	0.224362	227	69
rs266374	7	65014265	AC	+	656	1	0.0692819	0.445884	213	301	142	593	569	-0.226937	-0.225766	0.000234979	0.000181419	1.29523	0.772062	68	70
rs6784750	16	73409136	AG	+	655	0.998476	1	0.161832	460	178	17	592	569	0.276805	0.28909	0.000355104	0.000183797	1.93204	0.517588	95	71
rs7822476	21	91876624	GA	+	656	1	0.332689	0.278963	346	254	56	593	569	0.211487	0.23534	0.00084849	0.000185787	4.567	0.218962	237	72
rs6935542	19	166817722	AG	+	656	1	0.338432	0.141768	486	154	16	593	569	-0.263525	-0.305625	0.00119416	0.000188275	6.3426	0.157664	338	74
rs9347129	19	166815924	AC	+	656	1	0.338432	0.141768	486	154	16	593	569	-0.263525	-0.305625	0.00119416	0.000188275	6.3426	0.157664	337	73
rs7083081	2	130306510	GA	+	656	1	0.546881	0.201982	415	217	24	593	569	-0.246102	-0.266787	0.000577664	0.000190919	3.0257	0.330502	158	75
rs1491074	19	113790603	GA	+	656	1	0.916149	0.245427	374	242	40	593	569	-0.16534	-0.245924	0.011816	0.000191517	61.697	0.0162083	3702	76
rs2339745	18	172292640	GA	+	656	1	0.0325486	0.070122	571	78	7	593	569	0.378926	0.38215	0.000275085	0.000192096	1.43202	0.698315	78	77
rs727453	10	52196331	AG	+	655	0.998476	0.842904	0.270229	350	256	49	592	568	0.22296	0.240884	0.000559916	0.000192137	2.91415	0.343153	151	78
rs9919560	3	11547547	CA	+	656	1	0.727602	0.339177	284	299	73	593	569	-0.212108	-0.223208	0.000388596	0.000194745	1.99541	0.501151	104	79
rs953111	1	219929051	AG	+	654	0.996951	1	0.286697	333	267	54	591	567	0.19013	0.236631	0.00296018	0.000197382	14.9972	0.0666791	878	80
rs2087646	19	113686798	GA	+	652	0.993902	0.885238	0.161043	458	178	16	589	565	-0.238543	-0.288703	0.00203402	0.000198222	10.2613	0.0974537	596	81
rs7101624	3	132355265	GA	+	655	0.998476	0.156901	0.455725	203	307	145	592	568	-0.194548	-0.205961	0.00036942	0.000198879	1.85751	0.538355	99	82
rs1040328	14	35832534	GA	+	656	1	0.133662	0.442835	194	343	119	593	569	-0.201799	-0.216659	0.000525556	0.000199516	2.63415	0.379628	134	83
rs569330	16	198201710	CA	+	656	1	0.0702597	0.45122	209	302	145	593	569	-0.225707	-0.215008	0.000107791	0.000205629	0.524199	1.90767	31	84
rs747182	13	35416303	AG	+	655	0.998476	1	0.136641	488	155	12	592	568	0.298787	0.309725	0.000379058	0.000208312	1.81966	0.549553	101	85
rs10783497	4	50891430	AG	+	656	1	0.655817	0.0480183	595	59	2	593	569	0.433427	0.515272	0.00164219	0.000208491	7.87652	0.12696	473	86
rs17505402	17	152062876	CA	+	594	0.905488	8.41789e-08	0.377946	261	217	116	541	520	-0.237194	-0.235969	0.000328835	0.000211793	1.55262	0.644071	92	87
rs7659540	17	153227990	AG	+	656	1	0.00490164	0.314787	324	251	81	593	569	0.203082	0.232817	0.00145133	0.00021453	6.76517	0.147816	422	88
rs807576	12	15721907	AG	+	656	1	0.0612869	0.193598	419	220	17	593	569	0.291128	0.279939	9.35037e-05	0.00021678	0.43133	2.31841	26	89
rs32808	18	14571208	GA	+	655	0.998476	0.299436	0.251908	361	258	36	592	568	-0.228664	-0.249011	0.000743554	0.000218335	3.40556	0.293637	208	90
rs3862101	21	17651768	GA	+	656	1	0.0308206	0.162348	468	163	25	593	569	0.228162	0.286845	0.00304938	0.00021984	13.8709	0.0720934	909	91
rs17247353	2	67668342	AG	+	656	1	0.105259	0.0929878	536	118	2	593	569	-0.413107	-0.382182	7.26161e-05	0.000221563	0.327745	3.05116	14	92
rs12449027	8	13080443	GA	+	656	1	0.0498633	0.0365854	611	42	3	593	569	-0.465716	-0.53293	0.00121735	0.000226793	5.3677	0.1863	349	93
rs3129667	5	21428559	AG	+	656	1	0.393062	0.164634	461	174	21	593	569	-0.269797	-0.280977	0.000422781	0.000231533	1.82601	0.547643	114	94
rs2423873	13	14884935	GA	+	656	1	0.883569	0.158537	465	174	17	593	569	-0.270051	-0.298706	0.00101643	0.000236858	4.29131	0.233029	291	95
rs10501617	3	85793665	GA	+	655	0.998476	0.259261	0.256489	356	262	37	592	568	0.246385	0.247964	0.00024949	0.000239228	1.0429	0.958869	71	96
rs2578546	18	5609945	AG	+	656	1	0.117328	0.22561	386	244	26	593	569	0.245274	0.249204	0.000305131	0.000253774	1.20237	0.831689	88	97
rs6842366	17	7526014	GA	+	646	0.984756	0.581068	0.477554	180	315	151	584	560	-0.195198	-0.208158	0.000642749	0.000255794	2.51276	0.397969	176	98
rs10512419	22	137270826	GA	+	656	1	0.823409	0.097561	533	118	5	593	569	-0.330434	-0.351668	0.000574427	0.000260906	2.20166	0.454203	157	99
rs2125301	3	91586478	AC	+	655	0.998476	0.576104	0.298473	319	281	55	592	568	0.233409	0.227369	0.00018924	0.000261638	0.723288	1.38258	49	100
rs250597	18	163980289	AG	+	656	1	0.236632	0.450457	190	341	125	593	569	0.182162	0.219132	0.00232222	0.00026739	8.68478	0.115144	688	101
rs2054539	17	122790157	AG	+	656	1	0.437738	0.0830793	553	97	6	593	569	0.335358	0.371796	0.000980293	0.000276519	3.54512	0.282078	282	102
rs9643190	21	125291224	AG	+	656	1	0.624024	0.0426829	600	56	0	593	569	0.461094	0.51159	0.000952077	0.000276801	3.43958	0.290733	272	103
rs7234450	10	64275478	GA	+	655	0.998476	0.205064	0.19084	434	192	29	593	569	0.27053	0.271967	0.000376425	0.000279267	1.34791	0.741891	100	104
rs7601345	12	52716036	AG	+	655	0.998476	0.183854	0.49313	177	310	168	592	568	0.20848	0.199674	0.000171883	0.000282849	0.607683	1.64559	46	105
rs5026446	10	74163927	GA	+	656	1	0.300312	0.0617378	579	73	4	593	569	0.427434	0.421407	0.000283192	0.000283166	1.00009	0.999909	81	106
rs3913348	18	20983113	AC	+	654	0.996951	0.83016	0.240061	376	242	36	591	567	-0.265023	-0.242948	7.27097e-05	0.000284085	0.255944	3.90711	15	107
rs7306935	4	101561560	AC	+	633	0.964939	0.668117	0.104265	509	116	8	573	551	-0.337312	-0.337783	0.000313795	0.000284193	1.10416	0.905664	89	108
rs261039	18	169214953	GA	+	653	0.995427	0.537248	0.19755	423	202	28	592	568	0.250786	0.252276	0.000317279	0.000288965	1.09798	0.91076	91	109
rs429738	15	19751425	CA	+	656	1	1	0.264482	355	255	46	593	569	-0.181411	-0.22917	0.00442294	0.000290137	15.2443	0.0655983	1307	110
rs10838610	3	46642836	AG	+	656	1	0.104336	0.108994	525	119	12	593	569	0.262815	0.319977	0.00329282	0.000293189	11.231	0.089039	991	113
rs11038910	3	46500100	GA	+	656	1	0.104336	0.108994	525	119	12	593	569	0.262815	0.319977	0.00329282	0.000293189	11.231	0.089039	990	112
rs17787804	3	46463461	GA	+	656	1	0.104336	0.108994	525	119	12	593	569	0.262815	0.319977	0.00329282	0.000293189	11.231	0.089039	989	111
rs510626	10	7478133	AG	+	656	1	0.406797	0.0282012	620	35	1	593	569	0.560621	0.596838	0.00052846	0.000294271	1.79582	0.556848	136	114
rs7862217	22	27141645	GA	+	651	0.992378	0.149209	0.205837	404	226	21	588	565	-0.227975	-0.266497	0.00190295	0.000294368	6.46453	0.15469	553	115
rs601715	3	87461466	AG	+	654	0.996951	0.0670086	0.309633	322	259	73	591	567	0.190157	0.216702	0.00173152	0.000295262	5.86435	0.170522	498	116
rs4282237	17	138712811	GA	+	655	0.998476	0.500387	0.0969466	532	119	4	592	568	0.337506	0.362847	0.000780764	0.000296612	2.63228	0.379899	220	117
rs4899633	6	76553963	AC	+	655	0.998476	0.687809	0.177099	445	188	22	592	568	0.25873	0.274515	0.000726402	0.000301713	2.4076	0.415352	197	118
rs8086400	10	65639534	GA	+	656	1	0.192236	0.208079	417	205	34	593	569	0.256054	0.24877	0.000260997	0.00030235	0.863228	1.15844	76	119
rs702206	22	18629455	AG	+	655	0.998476	0.00534695	0.0801527	560	85	10	592	568	-0.339261	-0.377063	0.0013815	0.000304057	4.54356	0.220092	394	120
rs522207	16	198199411	GA	+	655	0.998476	0.0507354	0.476336	192	302	161	593	569	-0.213172	-0.209609	0.000293779	0.000307034	0.956831	1.04512	85	121
rs2441865	21	105235278	GA	+	654	0.996951	0.0614954	0.252294	375	228	51	591	567	0.217352	0.232614	0.000963427	0.000308086	3.12714	0.319781	276	122
rs2407912	8	60158141	CA	+	650	0.990854	0.930397	0.339231	283	293	74	588	564	0.181247	0.225612	0.0040418	0.000309772	13.0477	0.0766421	1205	123
rs10499310	19	158821523	AG	+	656	1	0.414043	0.395579	245	303	108	593	569	-0.178966	-0.204955	0.00159295	0.000319276	4.98925	0.200431	462	124
rs776755	22	18629300	GA	+	656	1	0.00528794	0.0800305	561	85	10	593	569	-0.338804	-0.375673	0.00140464	0.000320095	4.38818	0.227885	401	125
rs1126301	16	69680390	AG	+	656	1	1	0.223323	395	229	32	593	569	0.253612	0.254357	0.000299579	0.00032168	0.931294	1.07377	87	126
rs5024937	8	7830985	GA	+	648	0.987805	1	0.0470679	588	59	1	585	561	0.454487	0.477546	0.000569286	0.000324273	1.75558	0.569613	154	127
rs10042997	18	161844794	GA	+	656	1	0.0511536	0.276677	333	283	40	593	569	-0.250975	-0.243431	0.000242008	0.00032567	0.743108	1.3457	69	128
rs1017035	20	6174894	AG	+	654	0.996951	0.478089	0.20948	405	224	25	591	567	-0.232923	-0.262751	0.00133351	0.000330895	4.03002	0.248138	377	129
rs2124147	16	172878162	GA	+	656	1	0.344538	0.448933	193	337	126	593	569	-0.219126	-0.214009	0.000217304	0.00033363	0.651331	1.53532	64	130
rs6060959	13	29853708	GA	+	656	1	0.0393488	0.235518	393	217	46	593	569	0.2354	0.249501	0.000789554	0.000333729	2.36586	0.42268	223	131
rs476268	10	7506844	GA	+	656	1	0.0567149	0.066311	575	75	6	593	569	0.36642	0.430789	0.00162671	0.000334065	4.86944	0.205362	468	132
rs12269979	3	87348692	AG	+	656	1	0.00501966	0.0243902	627	26	3	593	569	0.620023	0.636466	0.000624011	0.000336616	1.85378	0.539439	171	133
rs6886538	18	166013039	CA	+	656	1	0.86101	0.333841	292	290	74	593	569	-0.205833	-0.220168	0.00088249	0.000338315	2.60848	0.383364	253	134
rs2979788	21	17656166	AG	+	656	1	0.0104458	0.134146	500	136	20	593	569	0.272418	0.301173	0.00114312	0.000339131	3.37074	0.296671	321	135
rs8127690	14	17131427	CA	+	655	0.998476	0.0634362	0.232824	394	217	44	592	568	0.207508	0.239049	0.0021172	0.000340983	6.20909	0.161054	623	136
rs6543570	12	240266103	AG	+	656	1	0.74548	0.403201	236	311	109	593	569	0.206333	0.207081	0.000385288	0.000342638	1.12448	0.889303	103	137
rs3814997	15	21365233	AG	+	653	0.995427	0.421334	0.17611	440	196	17	590	566	-0.231992	-0.27265	0.00235602	0.000344937	6.83029	0.146407	695	138
rs6865926	18	166113230	AG	+	655	0.998476	0.700425	0.115267	511	137	7	592	568	-0.305925	-0.329729	0.000892101	0.000347742	2.56541	0.389802	256	139
rs675417	10	8416648	GA	+	655	0.998476	0.00298803	0.338931	269	328	58	592	568	0.224423	0.231872	0.00053714	0.000349014	1.53902	0.649763	139	140
rs6836128	17	88082794	AG	+	656	1	0.645781	0.14939	476	164	16	593	569	0.246651	0.295009	0.00339972	0.000350865	9.68953	0.103204	1019	141
rs6131660	13	15239552	AG	+	655	0.998476	0.905376	0.207634	410	218	27	592	568	0.228188	0.255401	0.00158076	0.000351194	4.50111	0.222167	458	142
rs6514322	13	12703515	GA	+	656	1	0.0100108	0.0769817	564	83	9	593	569	0.381733	0.377389	0.000402486	0.000356918	1.12767	0.886783	107	143
rs2866239	17	101856712	AC	+	598	0.911585	0.203135	0.152174	434	146	18	542	520	0.30482	0.294264	0.000189168	0.000361073	0.523905	1.90874	48	144
rs1192655	2	37202913	GA	+	656	1	0.000174447	0.134909	503	129	24	593	569	0.24905	0.29966	0.00411726	0.000363901	11.3142	0.0883844	1231	145
rs1992623	8	85203281	CA	+	648	0.987805	0.284443	0.280093	330	273	45	586	562	-0.21085	-0.231057	0.00113544	0.000365679	3.10503	0.322058	320	146
rs10852363	8	13048123	AG	+	655	0.998476	0.8487	0.287023	334	266	55	593	569	-0.196878	-0.220339	0.00149207	0.000366416	4.07208	0.245575	435	147
rs10505055	21	105205725	CA	+	641	0.977134	0.0109585	0.234009	388	206	47	581	559	0.218204	0.233478	0.00105272	0.000368119	2.85974	0.349682	299	148
rs285314	16	36229432	AG	+	654	0.996951	0.482267	0.489297	175	318	161	591	568	0.225799	0.201377	8.31816e-05	0.000371899	0.223667	4.47093	22	149
rs810364	20	73777987	AG	+	625	0.952744	1	0.0904	517	103	5	565	544	0.340401	0.360502	0.000787043	0.000372154	2.11483	0.472852	222	150
rs2546214	21	74334996	AG	+	655	0.998476	0.0574682	0.20687	420	199	36	592	568	0.211179	0.244118	0.00217474	0.00037302	5.8301	0.171524	648	151
rs3750736	2	74341617	GA	+	656	1	0.347738	0.47561	174	340	142	593	569	0.208934	0.211601	0.000450151	0.000378344	1.18979	0.840483	123	152
rs9502754	19	8921038	GA	+	656	1	0.171525	0.412348	235	301	120	593	569	0.170276	0.207519	0.00391194	0.000378479	10.3359	0.0967498	1169	153
rs855788	15	35804025	GA	+	656	1	0.639037	0.485518	177	321	158	593	569	0.178495	0.203304	0.00204215	0.000382221	5.34285	0.187166	602	154
rs4743316	22	97579933	AG	+	654	0.996951	0.000142872	0.347095	301	252	101	591	567	0.199561	0.205543	0.000778085	0.000383441	2.02922	0.492801	219	155
rs13116507	17	144258888	AG	+	656	1	0.0520681	0.21875	409	207	40	593	569	0.22771	0.240794	0.00101629	0.000383952	2.64691	0.377799	290	156
rs1509635	9	43892644	GA	+	656	1	0.381332	0.277439	347	254	55	593	569	-0.221245	-0.216061	0.000281708	0.000387573	0.726851	1.3758	80	157
rs70041	19	44670782	GA	+	652	0.993902	0.0159401	0.265337	364	230	58	589	565	-0.16445	-0.215316	0.00753409	0.00038782	19.4268	0.0514753	2305	158
rs6556045	18	172161071	GA	+	654	0.996951	1	0.0428135	599	54	1	591	567	0.468661	0.495893	0.00121959	0.000389824	3.12857	0.319635	352	159

## Sheet: S4d_SE_TG_NoLLT
SNP	Chromosome	Position	Coding	Strand	SampleSize.total	CallRate	p.HWE	Q.2	P.11	P.12	P.22	SampleSize.una	SampleSize.adj	effB.una	effB.adj	P1df.una	P1df.adj	p.ratio.unaBYadj	p.ratio.adjBYuna	SNP.rank.una	SNP.rank.adj
rs2122775	3	102904474	AG	+	655	0.998476	0.0945276	0.274046	354	243	58	593	569	0.303551	0.298173	5.99154e-06	5.32477e-06	1.12522	0.888715	2	1
rs4826748	23	4875818	GA	+	656	1	0.168918	0.220274	446	131	79	593	569	0.24283	0.253439	2.38874e-05	7.73004e-06	3.0902	0.323604	7	3
rs5915871	23	4862893	CA	+	656	1	0.168918	0.220274	446	131	79	593	569	0.24283	0.253439	2.38874e-05	7.73004e-06	3.0902	0.323604	6	2
rs5952756	23	45177745	AG	+	655	0.998476	0.753228	0.1	561	57	37	592	568	-0.36524	-0.343973	3.1035e-06	8.01013e-06	0.387447	2.581	1	4
rs3823763	20	33374419	AC	+	651	0.992378	0.182495	0.482335	183	308	160	589	566	-0.257097	-0.260389	1.47862e-05	8.06614e-06	1.83312	0.545519	3	5
rs386549	12	225570113	GA	+	656	1	0.407681	0.137195	491	150	15	593	569	-0.370113	-0.374979	1.53565e-05	8.91519e-06	1.72251	0.58055	4	6
rs2029038	23	4913071	AG	+	656	1	1	0.283537	399	142	115	593	569	0.224904	0.229353	2.54739e-05	1.32132e-05	1.92791	0.518697	8	7
rs758989	20	44169531	AG	+	656	1	0.638929	0.48247	179	321	156	593	569	-0.195496	-0.244781	0.000747858	1.97364e-05	37.8923	0.0263906	187	8
rs281541	12	225601556	GA	+	656	1	0.515938	0.140244	487	154	15	593	569	-0.341502	-0.355085	5.38329e-05	2.1259e-05	2.53224	0.394907	12	9
rs683979	10	64004768	GA	+	654	0.996951	0.936824	0.440367	204	324	126	592	568	0.210099	0.248824	0.000413292	2.53318e-05	16.3152	0.0612926	100	10
rs5915572	23	5500890	GA	+	656	1	0.085759	0.231707	445	118	93	593	569	0.223887	0.233064	7.28462e-05	2.6536e-05	2.74519	0.364274	15	11
rs8096471	10	59099373	GA	+	655	0.998476	0.413685	0.212214	410	212	33	592	568	0.260554	0.286807	0.000226651	3.80979e-05	5.94916	0.168091	52	12
rs1347924	18	124621072	CA	+	656	1	0.476135	0.442073	209	314	133	593	569	-0.230377	-0.238861	9.18727e-05	3.81501e-05	2.40819	0.41525	21	13
rs149908	23	126201302	CA	+	650	0.990854	0.3525	0.385385	316	167	167	587	563	-0.189985	-0.196664	0.000126808	5.55114e-05	2.28437	0.437758	29	14
rs921336	10	72861460	CA	+	652	0.993902	0.534527	0.106595	522	121	9	589	565	-0.309153	-0.364305	0.000773704	5.80793e-05	13.3215	0.0750665	198	15
rs6541030	1	12530765	GA	+	635	0.967988	1	0.193701	413	198	24	576	553	0.291719	0.286982	5.49459e-05	5.84941e-05	0.93934	1.06458	13	16
rs9319758	10	64003854	AC	+	644	0.981707	0.366804	0.153727	464	162	18	585	562	0.255209	0.32593	0.00167454	6.15676e-05	27.1984	0.0367669	465	17
rs4829830	23	135257169	CA	+	615	0.9375	0.564417	0.369919	305	165	145	557	534	0.164181	0.201222	0.0011116	6.33659e-05	17.5426	0.0570042	294	18
rs204330	23	125988363	AG	+	647	0.98628	0.0256064	0.348532	338	167	142	585	562	-0.188537	-0.198736	0.000186404	6.33788e-05	2.9411	0.340008	44	19
rs13395560	12	207227055	GA	+	656	1	0.83957	0.259909	358	255	43	593	569	-0.239664	-0.263781	0.000351358	6.62893e-05	5.30037	0.188666	79	20
rs7207933	9	77131682	CA	+	656	1	0.364521	0.3125	315	272	69	593	569	0.232581	0.241617	0.000175595	7.01632e-05	2.50267	0.399574	42	21
rs9319757	10	64003719	AG	+	656	1	0.662862	0.159299	465	173	18	593	569	0.251925	0.319225	0.00178237	7.59054e-05	23.4815	0.0425868	507	22
rs1151860	4	119818447	AG	+	656	1	1	0.0129573	639	17	0	593	569	-1.03195	-0.986218	3.72579e-05	8.44636e-05	0.441112	2.267	10	23
rs700715	18	132754630	GA	+	656	1	1	0.364329	265	304	87	593	569	0.216445	0.238034	0.000414818	8.73366e-05	4.74965	0.210542	101	24
rs1562660	12	207013899	AG	+	635	0.967988	1	0.198425	408	202	25	575	551	-0.241695	-0.281592	0.000895728	9.15707e-05	9.78182	0.10223	234	25
rs10260011	20	84547292	GA	+	651	0.992378	0.782925	0.308756	309	282	60	588	564	-0.254507	-0.248144	8.81688e-05	9.60791e-05	0.917668	1.08972	17	26
rs6476614	22	3710298	AC	+	656	1	0.00977664	0.477134	196	294	166	593	569	0.198943	0.221833	0.000612173	9.80973e-05	6.24046	0.160245	158	27
rs6635268	23	135266054	AG	+	656	1	0.822198	0.379573	323	168	165	593	569	0.158294	0.188371	0.00109406	0.000100368	10.9005	0.0917393	288	28
rs613571	10	64042401	AG	+	653	0.995427	0.926901	0.308576	311	281	61	590	567	-0.24244	-0.247822	0.000173944	0.000104914	1.65796	0.603151	40	29
rs912002	23	135258149	AG	+	656	1	0.732741	0.372713	328	167	161	593	569	0.152205	0.187599	0.00173036	0.000111249	15.5539	0.0642926	483	30
rs6638610	23	6294463	AG	+	654	0.996951	0.744644	0.434251	286	168	200	591	568	-0.152646	-0.182399	0.00140643	0.000114586	12.274	0.0814732	390	31
rs7586145	12	134156368	AG	+	656	1	0.0524601	0.15625	474	159	23	593	569	0.275235	0.308664	0.000767988	0.000117831	6.51769	0.153429	195	32
rs11764107	20	87359801	GA	+	654	0.996951	1	0.00764526	644	10	0	592	568	-1.17722	-1.22977	0.000321846	0.000117923	2.72929	0.366396	72	33
rs1993352	23	6295300	AG	+	656	1	0.913065	0.433689	287	169	200	593	569	-0.144365	-0.18155	0.00246763	0.000123793	19.9334	0.050167	731	34
rs8098279	10	55136076	GA	+	654	0.996951	0.872064	0.141437	481	161	12	591	568	0.264204	0.332301	0.00258086	0.000126028	20.4784	0.0488319	772	35
rs11096073	23	126077531	CA	+	648	0.987805	0.38538	0.435185	285	162	201	585	561	0.173317	0.183257	0.000360369	0.000126329	2.85263	0.350554	83	36
rs2293172	20	149900475	CA	+	656	1	0.276953	0.0594512	582	70	4	593	569	-0.475759	-0.472761	0.000156771	0.00013634	1.14986	0.869674	36	37
rs16309	23	126188919	GA	+	656	1	0.0248735	0.341463	348	168	140	593	569	-0.185771	-0.188367	0.000228838	0.00014394	1.58982	0.629003	54	38
rs4826725	23	6317215	AG	+	655	0.998476	0.743267	0.435878	286	167	202	592	568	-0.141637	-0.179202	0.00294135	0.000148308	19.8327	0.0504218	903	39
rs1406961	13	61366365	CA	+	655	0.998476	0.770429	0.0732824	563	88	4	592	568	-0.371709	-0.411412	0.000636822	0.000148764	4.28075	0.233604	162	40
rs6065532	13	40828708	GA	+	654	0.996951	0.688132	0.17737	444	188	22	592	568	-0.230527	-0.2825	0.00260727	0.000152773	17.0663	0.0585948	781	41
rs4246880	22	112027511	AG	+	651	0.992378	0.0273591	0.398618	249	285	117	588	564	0.212	0.222413	0.000427238	0.000153031	2.79184	0.358186	105	42
rs6590388	3	128841770	AG	+	655	0.998476	0.749341	0.425954	218	316	121	592	568	-0.192338	-0.216923	0.00100951	0.00015321	6.58909	0.151766	268	43
rs701277	20	83369034	GA	+	656	1	1	0.109756	520	128	8	593	569	-0.351719	-0.347134	0.00016138	0.000162484	0.993207	1.00684	37	44
rs1940995	10	5633417	AG	+	656	1	1	0.314024	309	282	65	593	569	0.20875	0.240726	0.00119576	0.000163751	7.30231	0.136943	318	45
rs256869	18	132163271	AG	+	656	1	0.0955069	0.27439	354	244	58	593	569	0.203544	0.241819	0.0019038	0.000167005	11.3996	0.0877223	539	46
rs6511939	11	14545425	GA	+	655	0.998476	1	0.0114504	640	15	0	592	568	1.04875	1.00029	0.000137147	0.000167261	0.819958	1.21958	32	47
rs4361809	22	4359729	GA	+	653	0.995427	0.0664167	0.375191	266	284	103	591	567	0.191108	0.2201	0.00142131	0.000172282	8.24989	0.121214	394	48
rs4307650	2	104949842	CA	+	655	0.998476	0.42165	0.321374	306	277	72	592	568	-0.274347	-0.238747	2.09541e-05	0.000183537	0.114168	8.75901	5	49
rs4520856	8	7098727	GA	+	656	1	0.92677	0.304116	318	277	61	593	569	-0.216925	-0.238781	0.000962061	0.000192899	4.98737	0.200506	253	50
rs6915344	19	15348423	AG	+	644	0.981707	8.29495e-08	0.354037	300	232	112	582	559	-0.173713	-0.203025	0.00184704	0.000196124	9.41771	0.106183	516	51
rs7120142	3	102922991	GA	+	652	0.993902	0.425503	0.432515	215	310	127	590	567	0.2143	0.218174	0.00036696	0.000201036	1.82535	0.54784	87	52
rs10758426	22	3712895	GA	+	655	0.998476	0.00358487	0.461069	209	288	158	592	568	0.191021	0.212671	0.00105445	0.000201803	5.22515	0.191382	276	53
rs869834	6	62246897	GA	+	655	0.998476	0.813516	0.461069	192	322	141	592	568	-0.176364	-0.208988	0.00202003	0.000204047	9.89986	0.101012	580	54
rs9808582	13	40824734	AG	+	655	0.998476	0.692256	0.180916	441	191	23	592	569	-0.22674	-0.274695	0.00290085	0.000210816	13.7601	0.072674	888	55
rs4532960	2	104657396	GA	+	655	0.998476	0.326043	0.321374	307	275	73	592	568	-0.269328	-0.235144	2.74511e-05	0.000215837	0.127185	7.86259	9	56
rs704285	16	71803256	AG	+	656	1	0.117949	0.478659	168	348	140	593	569	0.190626	0.217061	0.00138171	0.000218807	6.31477	0.158359	383	57
rs921561	3	96824706	GA	+	654	0.996951	0.17608	0.434251	218	304	132	591	568	-0.211046	-0.22177	0.000544135	0.000223819	2.43114	0.411329	140	58
rs3923280	23	134434090	AG	+	656	1	0.707175	0.0754573	581	51	24	593	569	-0.308593	-0.32207	0.000602509	0.000226005	2.66591	0.375106	153	59
rs7880536	23	134460015	AG	+	656	1	0.707175	0.0754573	581	51	24	593	569	-0.308593	-0.32207	0.000602509	0.000226005	2.66591	0.375106	154	60
rs6871976	18	132578729	AG	+	655	0.998476	1	0.487786	172	327	156	592	568	-0.211111	-0.205764	0.000234989	0.000232866	1.00912	0.990963	57	61
rs6442737	16	2542333	GA	+	634	0.966463	1	0.292587	317	263	54	572	549	-0.253496	-0.236044	9.2303e-05	0.000233174	0.395855	2.52618	22	62
rs16910442	2	52295276	AG	+	644	0.981707	0.21545	0.107143	510	130	4	583	559	0.339024	0.356433	0.000574697	0.000236464	2.43038	0.411458	145	63
rs17770088	8	82308485	AG	+	656	1	0.348966	0.296494	330	263	63	593	569	0.221552	0.227755	0.000440801	0.000239604	1.83971	0.543565	110	64
rs1558469	20	44112435	AG	+	656	1	0.531514	0.480945	181	319	156	593	569	0.180093	0.211688	0.00215616	0.00024232	8.898	0.112385	622	65
rs2778902	22	100372280	GA	+	656	1	0.47322	0.428354	219	312	125	593	569	0.199378	0.216001	0.000978434	0.000245239	3.98971	0.250644	261	66
rs6776815	16	63131629	GA	+	656	1	0.143569	0.200457	413	223	20	593	569	-0.262276	-0.270432	0.000478416	0.000249506	1.91745	0.521526	125	67
rs1887305	13	53277244	GA	+	656	1	1	0.00838415	645	11	0	593	569	1.08306	1.17909	0.000534756	0.000257561	2.07623	0.481642	137	68
rs10499545	20	22223666	AG	+	656	1	0.152043	0.143293	486	152	18	593	569	-0.281728	-0.294202	0.000641044	0.000263688	2.43107	0.411341	163	69
rs848051	6	36380104	AC	+	656	1	0.0536121	0.202744	425	196	35	593	569	-0.215069	-0.25291	0.00233759	0.000263811	8.86086	0.112856	681	70
rs4826792	23	5518048	AG	+	656	1	0.0270072	0.275915	412	126	118	593	569	0.184119	0.194085	0.00062244	0.000264181	2.35611	0.424428	160	71
rs560906	4	10013471	GA	+	652	0.993902	0.307487	0.259202	363	240	49	589	565	0.226298	0.247766	0.00118336	0.000280955	4.21192	0.237421	314	72
rs723212	2	61395919	AG	+	656	1	0.526415	0.441311	209	315	132	593	569	-0.230542	-0.21065	9.00766e-05	0.000282228	0.319162	3.1332	20	73
rs412284	8	82331515	GA	+	656	1	0.860378	0.332317	291	294	71	593	569	0.215948	0.221072	0.000463208	0.000283836	1.63196	0.612762	116	74
rs1482088	17	86778197	CA	+	654	0.996951	0.726354	0.212538	407	216	31	591	567	-0.240616	-0.256186	0.000786848	0.000287817	2.73385	0.365784	203	75
rs11897394	12	9274984	AG	+	656	1	0.636215	0.207317	414	212	30	593	569	0.225019	0.257941	0.0018155	0.000295139	6.15135	0.162566	511	76
rs17577994	21	20930275	GA	+	656	1	0.178076	0.283537	344	252	60	593	569	0.203027	0.234686	0.00192537	0.000295861	6.50767	0.153665	546	77
rs5916139	23	5479735	AC	+	656	1	0.0929937	0.31936	376	141	139	593	569	0.148774	0.183014	0.00363191	0.000298707	12.1588	0.0822451	1101	78
rs6475359	22	1965279	GA	+	656	1	0.573048	0.41311	222	326	108	593	569	0.198708	0.213559	0.000964592	0.000308476	3.12695	0.3198	255	79
rs10117261	22	91766742	GA	+	656	1	0.752036	0.442073	202	328	126	593	569	0.19954	0.210671	0.000824598	0.000311851	2.6442	0.378186	213	80
rs940114	15	47975247	GA	+	656	1	0.362496	0.381098	257	298	101	593	569	-0.225789	-0.215029	0.000225315	0.000316688	0.711473	1.40554	51	81
rs5975721	23	135253151	GA	+	656	1	0.728653	0.353659	342	164	150	593	569	0.148665	0.181004	0.00314729	0.000322553	9.75745	0.102486	957	82
rs1007464	9	74932660	GA	+	656	1	0.93517	0.400152	235	317	104	593	569	0.199052	0.211061	0.000840528	0.000322826	2.60366	0.384075	218	83
rs254326	8	82305351	GA	+	655	0.998476	1	0.377863	253	309	93	592	568	0.206346	0.21597	0.000724658	0.000323214	2.24204	0.446023	182	84
rs6486731	4	127878174	GA	+	656	1	0.176008	0.360518	260	319	77	593	569	-0.23857	-0.218419	9.99578e-05	0.000323526	0.308964	3.23662	24	85
rs10488583	20	20603957	AG	+	656	1	0.13997	0.219512	406	212	38	593	569	0.194032	0.262491	0.00828053	0.000332758	24.8845	0.0401856	2462	86
rs2726807	17	183374392	GA	+	656	1	0.33297	0.410823	234	305	117	593	569	-0.165904	-0.210587	0.00582824	0.000336458	17.3223	0.057729	1750	87
rs11803192	1	5546270	AG	+	656	1	1	0.0815549	553	99	4	593	569	-0.380498	-0.370684	0.000298745	0.000338413	0.882782	1.13278	68	89
rs1935762	1	5539417	AG	+	655	0.998476	1	0.0816794	552	99	4	592	569	-0.379566	-0.370684	0.000308761	0.000338413	0.912379	1.09604	70	88
rs5916138	23	5477127	AG	+	655	0.998476	0.0400853	0.31374	381	137	137	593	569	0.146972	0.181805	0.00417105	0.000340546	12.2481	0.0816451	1253	90
rs3828009	13	17566824	AG	+	644	0.981707	0.0756608	0.0745342	555	82	7	581	559	0.413493	0.374643	0.000100154	0.000346547	0.289005	3.46014	25	91
rs2965507	20	52813508	AC	+	655	0.998476	1	0.129008	497	147	11	592	568	-0.295791	-0.310518	0.000857926	0.000352982	2.43051	0.411437	223	92
rs10487892	20	151487942	AG	+	655	0.998476	1	0.0320611	613	42	0	592	568	0.578662	0.570288	0.000456311	0.00035424	1.28814	0.776314	113	93
rs2305042	10	55204826	AC	+	655	0.998476	0.59311	0.239695	381	234	40	592	568	0.19481	0.240931	0.00419387	0.000356995	11.7477	0.0851232	1262	94
rs12673176	20	84538569	CA	+	656	1	0.561699	0.279726	337	271	48	593	569	-0.234464	-0.231658	0.000388346	0.000362601	1.071	0.933706	93	95
rs3904187	22	85199566	GA	+	647	0.98628	0.857268	0.123648	496	142	9	585	563	0.268431	0.313853	0.00287191	0.000364136	7.88692	0.126792	877	96
rs2287219	10	61737319	AG	+	656	1	0.476029	0.322409	297	295	64	593	569	-0.186512	-0.222465	0.00317187	0.000365308	8.68274	0.115171	963	97
rs9464779	19	15362784	AG	+	626	0.954268	0.000171053	0.498403	181	266	179	566	544	-0.180587	-0.200173	0.00176727	0.000367455	4.80947	0.207923	502	98
rs10883800	2	104661202	AC	+	650	0.990854	0.240926	0.211538	409	207	34	588	564	-0.266358	-0.255361	0.000233442	0.000370438	0.630178	1.58685	56	99
rs2927261	10	74731402	GA	+	656	1	0.202986	0.189787	425	213	18	593	569	-0.226243	-0.263865	0.00289125	0.000374671	7.71676	0.129588	883	100
rs4897466	19	131131160	CA	+	656	1	0.796174	0.346037	282	294	80	593	569	0.216396	0.218602	0.000518892	0.000375824	1.38068	0.724282	135	101
rs2665584	11	53776467	AG	+	655	0.998476	0.449765	0.191603	431	197	27	592	568	-0.223666	-0.265727	0.00321147	0.000378111	8.49346	0.117738	975	102
rs9303749	10	11792991	GA	+	655	0.998476	0.843189	0.109924	518	130	7	592	568	-0.305905	-0.33151	0.00131793	0.000382945	3.44157	0.290565	357	103
rs10826176	2	59811543	GA	+	645	0.983232	0.671687	0.364341	263	294	88	585	561	-0.207323	-0.208894	0.000553285	0.000386736	1.43065	0.698981	141	104
rs5930931	23	135254634	CA	+	645	0.983232	1	0.351163	341	155	149	584	561	0.150471	0.178781	0.00289202	0.00039154	7.38626	0.135387	884	105
rs10468681	10	11790066	CA	+	656	1	0.843234	0.109756	519	130	7	593	569	-0.304792	-0.330919	0.00137142	0.000391709	3.50111	0.285624	379	106
rs9552360	5	20587938	AG	+	656	1	0.858029	0.320122	302	288	66	593	569	-0.232084	-0.219994	0.000233198	0.000392336	0.594383	1.68242	55	107
rs7803082	20	271353	AG	+	655	0.998476	0.299519	0.0412214	603	50	2	592	568	0.498491	0.512919	0.000774598	0.000392413	1.97394	0.506602	199	108
rs4317935	2	52303465	GA	+	656	1	0.0181744	0.292683	341	246	69	593	569	0.195176	0.221394	0.00189681	0.000395925	4.79083	0.208732	533	109
rs2726817	17	183383476	AG	+	656	1	0.287313	0.242378	371	252	33	593	569	-0.221155	-0.240476	0.00135733	0.000396059	3.4271	0.291792	373	110
rs4978890	22	112006961	AG	+	653	0.995427	0.665431	0.346095	282	290	81	591	567	-0.216512	-0.211502	0.000381429	0.000402484	0.947689	1.0552	89	111
rs521040	4	10039117	AG	+	655	0.998476	0.314329	0.264122	360	244	51	592	569	0.206782	0.240798	0.00278881	0.000402715	6.92503	0.144404	846	112
rs4741967	22	4364278	GA	+	656	1	0.741359	0.384146	251	306	99	593	569	0.200221	0.21321	0.00113254	0.0004062	2.78813	0.358664	305	113
rs4741029	22	1047204	AG	+	656	1	0.424012	0.0289634	619	36	1	593	569	0.58643	0.651345	0.00202332	0.000406884	4.97273	0.201097	583	115
rs869939	22	1043465	AC	+	656	1	0.424012	0.0289634	619	36	1	593	569	0.58643	0.651345	0.00202332	0.000406884	4.97273	0.201097	582	114
rs7713266	18	37949284	AG	+	654	0.996951	0.792773	0.180428	438	196	20	591	567	0.252443	0.270114	0.00125173	0.000411457	3.0422	0.32871	335	116
rs10457556	19	131095818	GA	+	655	0.998476	0.738776	0.373282	255	311	89	592	568	-0.216495	-0.215571	0.000467265	0.000413725	1.12941	0.885418	118	117
rs7539455	1	11676755	AC	+	656	1	0.0299044	0.270579	360	237	59	593	569	-0.212648	-0.218767	0.000773386	0.000414424	1.86617	0.535857	197	118
rs12923000	8	63617912	GA	+	654	0.996951	0.555126	0.365443	267	296	91	593	569	-0.187482	-0.210345	0.0021183	0.000416979	5.08011	0.196846	617	119
rs1152490	6	55865987	AC	+	543	0.827744	0.412319	0.297422	272	219	52	492	476	-0.233853	-0.237217	0.000708835	0.000422609	1.67729	0.596201	176	120
rs2461892	2	65355689	GA	+	656	1	0.743612	0.137195	487	158	11	593	569	0.286033	0.309822	0.00122846	0.000425422	2.88763	0.346304	328	121
rs9880900	16	32146121	GA	+	656	1	0.694038	0.45122	200	320	136	593	569	-0.198737	-0.208895	0.000914768	0.000428503	2.1348	0.468428	238	122
rs6038832	13	7372609	AG	+	644	0.981707	0.600288	0.128882	490	142	12	581	558	-0.255855	-0.303679	0.00379794	0.000432252	8.7864	0.113812	1165	123
rs2330179	20	52805916	AG	+	656	1	0.529034	0.145579	481	159	16	593	569	-0.261031	-0.289957	0.00194568	0.000432263	4.50114	0.222166	553	124
rs11911614	14	20786056	AG	+	655	0.998476	0.205706	0.363359	273	288	94	592	568	-0.207722	-0.203198	0.000457874	0.000432678	1.05823	0.944973	114	125
rs9442813	19	73301649	GA	+	656	1	0.373209	0.404726	238	305	113	593	569	0.217266	0.21163	0.000419937	0.000441143	0.951928	1.0505	102	126
rs7795150	20	22247566	AC	+	654	0.996951	0.756564	0.252294	367	244	43	592	568	-0.264507	-0.232396	8.97336e-05	0.000441222	0.203375	4.91702	19	127
rs2200651	3	7286050	AG	+	656	1	1	0.0228659	626	30	0	593	569	-0.731173	-0.686553	0.000148322	0.000446212	0.332403	3.0084	35	128
rs10821475	22	91779711	GA	+	655	0.998476	0.579892	0.439695	202	330	123	592	568	0.193227	0.206015	0.00126517	0.000451897	2.79967	0.357184	337	129
rs7718220	18	177852557	AG	+	656	1	0.704107	0.189787	432	199	25	593	569	-0.279255	-0.260645	0.000184795	0.000452701	0.408205	2.44975	43	130
rs203490	23	126145807	GA	+	656	1	1	0.460366	268	172	216	593	569	-0.15961	-0.168896	0.00110023	0.000455097	2.41757	0.413638	291	131
rs7751393	19	166374384	AG	+	654	0.996951	0.92908	0.325688	298	286	70	591	567	0.19756	0.217921	0.00184818	0.000463228	3.98979	0.25064	517	132
rs2850768	10	59152390	AG	+	656	1	0.24617	0.137195	492	148	16	593	569	0.244993	0.297486	0.00416417	0.000468309	8.89192	0.112462	1251	133
rs3787751	14	37082033	AG	+	655	0.998476	0.688167	0.416794	220	324	111	592	568	-0.210438	-0.210904	0.000582873	0.000471289	1.23676	0.808563	148	134
rs1569422	1	9310031	AG	+	654	0.996951	0.831701	0.101682	528	119	7	591	567	-0.292001	-0.320739	0.00176544	0.000473332	3.72981	0.26811	498	135
rs7484360	4	127774401	AG	+	628	0.957317	0.000377503	0.380573	262	254	112	566	544	-0.165551	-0.213656	0.00790128	0.000475175	16.6281	0.060139	2364	136
rs4625093	22	108632599	AG	+	655	0.998476	0.0979305	0.382443	260	289	106	592	568	0.164799	0.201304	0.00481728	0.000475211	10.1371	0.0986472	1439	137
rs4607876	1	155462887	GA	+	654	0.996951	0.429449	0.450306	192	335	127	591	567	0.179932	0.205348	0.00261927	0.000478391	5.47516	0.182643	785	138
rs10070086	18	153040550	AG	+	656	1	0.609538	0.0815549	554	97	5	593	569	-0.422931	-0.369828	8.9004e-05	0.00049051	0.181452	5.5111	18	139
rs10407447	11	45561022	AG	+	604	0.920732	0.685705	0.184603	403	179	22	546	524	-0.26078	-0.265487	0.000826257	0.000492584	1.67739	0.596163	214	140
rs1317639	16	61544253	AG	+	656	1	0.320102	0.163872	462	173	21	593	569	-0.277198	-0.277405	0.000509175	0.000495072	1.02849	0.972304	133	141
rs2849380	10	59130340	GA	+	656	1	0.41094	0.137957	490	151	15	593	569	0.25376	0.295142	0.00319252	0.000499366	6.39315	0.156417	966	142
rs10796977	1	155502919	GA	+	653	0.995427	0.192807	0.235069	388	223	42	590	567	0.287954	0.248675	7.87926e-05	0.000499673	0.157688	6.34163	16	143
rs11158449	6	62259523	CA	+	656	1	0.266258	0.431402	219	308	129	593	569	-0.144819	-0.196323	0.0115401	0.000502469	22.9667	0.0435413	3486	144
rs1647558	10	11815317	GA	+	656	1	1	0.0998476	531	119	6	593	569	-0.328779	-0.335464	0.000840148	0.000515259	1.63054	0.613295	217	145
rs204360	23	126027190	AG	+	648	0.987805	0.518973	0.487654	243	178	227	586	563	0.163742	0.165833	0.000745779	0.000517441	1.44128	0.693827	186	146
rs1886394	1	155468309	AC	+	602	0.917683	0.0842302	0.449336	193	277	132	545	522	0.178247	0.203519	0.00285603	0.000527479	5.41448	0.18469	870	147
rs2029870	19	164808356	GA	+	654	0.996951	0.684698	0.108563	518	130	6	591	567	-0.337764	-0.32373	0.000379751	0.000529563	0.717102	1.3945	88	148
rs12968095	10	53813540	AG	+	654	0.996951	0.434929	0.490061	175	317	162	591	567	-0.17044	-0.196549	0.00292019	0.000539691	5.41086	0.184814	892	149
rs10500893	3	21124598	GA	+	656	1	0.319115	0.108994	518	133	5	593	569	0.303295	0.335366	0.00205069	0.000545376	3.76015	0.265947	591	150
rs7666425	17	507461	AG	+	626	0.954268	1.17442e-06	0.0902556	530	79	17	564	541	-0.302016	-0.333415	0.00219527	0.000546674	4.01568	0.249024	643	151
rs2410840	16	196464342	GA	+	656	1	0.128703	0.21189	414	206	36	593	569	-0.217799	-0.250552	0.00322286	0.000546682	5.89532	0.169626	982	152
rs10994443	2	62065524	GA	+	656	1	0.0817003	0.25686	371	233	52	593	569	0.256346	0.227216	0.000139275	0.000550999	0.252769	3.95618	33	153
rs7036239	22	91753684	GA	+	655	0.998476	0.84233	0.267939	352	255	48	592	568	0.230653	0.227291	0.00058103	0.000559519	1.03845	0.962978	147	154
rs1321847	19	80589906	GA	+	654	0.996951	0.354212	0.149083	470	173	11	591	567	0.250749	0.280186	0.00236909	0.000573738	4.12922	0.242176	694	155
rs723615	7	53155416	GA	+	656	1	0.746221	0.407012	233	312	111	593	569	0.216297	0.20579	0.000385898	0.000575198	0.670895	1.49055	91	156
rs7801327	20	154878817	AG	+	656	1	0.770338	0.159299	462	179	15	593	569	0.245375	0.272127	0.00240125	0.000576253	4.16701	0.23998	706	157
rs2067038	1	175185298	AC	+	656	1	0.682319	0.256098	365	246	45	593	569	0.203138	0.229101	0.00263685	0.000578321	4.55949	0.219323	792	158
rs4652211	1	175186554	AG	+	656	1	0.682319	0.256098	365	246	45	593	569	0.203138	0.229101	0.00263685	0.000578321	4.55949	0.219323	793	159

## Sheet: S4e_SC_TC_NoLLT
SNP	Chromosome	Position	Coding	Strand	SampleSize.total	CallRate	p.HWE	Q.2	P.11	P.12	P.22	SampleSize.una	SampleSize.adj	effB.una	effB.adj	P1df.una	P1df.adj	p.ratio.unaBYadj	p.ratio.adjBYuna	SNP.rank.una	SNP.rank.adj
rs2000999	8	70665594	GA	+	712	0.990264	0.15157	0.154494	514	176	22	706	685	0.154311	0.175455	0.0378587	0.0206627	1.83223	0.545784	11987	6680
rs5400	17	172214994	GA	+	719	1	0.274979	0.116829	564	142	13	713	692	0.0866623	0.10209	0.299324	0.223445	1.33959	0.746499	94635	71140
rs669552	17	173536358	AG	+	719	1	0.748321	0.0618915	633	83	3	713	692	0.123497	0.138223	0.266003	0.224968	1.1824	0.845736	84165	71627
rs222014	18	72851795	GA	+	718	0.998609	0.12242	0.139972	536	163	19	712	691	-0.0709793	-0.0847947	0.359201	0.275795	1.30242	0.767801	113716	87839
rs10041333	19	159586687	AG	+	719	1	0.753381	0.387344	272	337	110	713	692	0.0508691	0.0530443	0.367026	0.34877	1.05234	0.950261	116138	110997
rs47137	20	134367799	AC	+	706	0.981919	0.0480093	0.451133	226	323	157	700	679	-0.0575384	-0.0434615	0.286939	0.424764	0.675525	1.48033	90680	135227
rs2478571	2	18322433	GA	+	699	0.972184	0.93233	0.334764	310	310	79	693	673	-0.0461586	-0.0361944	0.431069	0.542522	0.794564	1.25855	136758	172777
rs12617790	12	31044277	AG	+	717	0.997218	0.421784	0.245467	404	274	39	711	690	0.0340106	0.0360812	0.596787	0.57573	1.03658	0.964716	189338	183262
rs2303324	12	31042740	GA	+	715	0.994437	0.79794	0.177622	482	212	21	709	688	0.0283456	0.0339683	0.692037	0.637165	1.08612	0.920709	219855	202657
rs2070657	14	26276888	AG	+	717	0.997218	0.551926	0.195258	467	220	30	711	690	0.000819539	0.00355638	0.990441	0.958606	1.03321	0.967858	315050	304847
rs2186830	10	423431	GA	+	710	0.987483	0.319689	0.344366	299	333	78	704	683	0.00405677	0.00200008	0.944799	0.972889	0.971128	1.02973	300470	309288

## Sheet: S4f_SC_LDL-C_NoLLT
SNP	Chromosome	Position	Coding	Strand	SampleSize.total	CallRate	p.HWE	Q.2	P.11	P.12	P.22	SampleSize.una	SampleSize.adj	effB.una	effB.adj	P1df.una	P1df.adj	p.ratio.unaBYadj	p.ratio.adjBYuna	SNP.rank.una	SNP.rank.adj
rs5400	17	172214994	GA	+	719	1	0.274979	0.116829	564	142	13	713	692	0.111193	0.124323	0.188837	0.144964	1.30264	0.76767	60329	46248
rs843319	20	20243804	AG	+	710	0.987483	0.501792	0.337324	316	309	85	704	683	-0.0818737	-0.0556924	0.160037	0.347834	0.460097	2.17346	51018	110854
rs10513684	17	172206904	GA	+	713	0.991655	0.617885	0.0371669	660	53	0	707	686	0.103536	0.102555	0.484449	0.496273	0.976176	1.02441	154004	157884
rs7583934	12	141621522	AC	+	719	1	0.00781079	0.253825	414	245	60	713	692	-0.020466	-0.0353352	0.737571	0.566696	1.30153	0.768327	234285	180462
rs12617790	12	31044277	AG	+	717	0.997218	0.421784	0.245467	404	274	39	711	690	0.0165589	0.026098	0.79915	0.689573	1.15891	0.862883	253831	219525
rs1864616	17	30640232	GA	+	707	0.98331	0.482824	0.250354	401	258	48	701	681	0.015674	0.0160169	0.805139	0.80141	1.00465	0.995369	255731	254976

## Sheet: S4g_SC_HDL-C_NoLLT
SNP	Chromosome	Position	Coding	Strand	SampleSize.total	CallRate	p.HWE	Q.2	P.11	P.12	P.22	SampleSize.una	SampleSize.adj	effB.una	effB.adj	P1df.una	P1df.adj	p.ratio.unaBYadj	p.ratio.adjBYuna	SNP.rank.una	SNP.rank.adj
rs1532624	8	55562980	CA	+	718	0.998609	0.100925	0.499304	191	337	190	712	691	0.302973	0.302667	2.18983e-09	2.27915e-09	0.960808	1.04079	2	2
rs365578	19	52973566	CA	+	716	0.995828	0.919352	0.243715	410	263	43	710	689	-0.0935487	-0.106313	0.122728	0.0773028	1.58763	0.62987	38565	24277
rs10519336	19	112508003	GA	+	717	0.997218	0.341677	0.267085	390	271	56	711	690	-0.0855788	-0.0764985	0.136051	0.181947	0.747748	1.33735	42785	57390
rs9863761	17	172837058	AG	+	713	0.991655	1	0.187938	470	218	25	707	686	-0.0546899	-0.0855116	0.401736	0.190187	2.11232	0.473413	127517	59987
rs3776817	19	178512354	GA	+	709	0.986092	0.841595	0.251058	396	270	43	703	682	-0.03496	-0.0777456	0.563026	0.19953	2.82176	0.354389	178928	62859
rs11708205	17	172954058	AG	+	719	1	0.441586	0.107789	570	143	6	713	692	-0.113312	-0.103951	0.17673	0.213507	0.827747	1.2081	55646	67230
rs2124147	17	172878162	AG	+	719	1	0.365002	0.441586	218	367	134	713	692	-0.0577222	-0.0638728	0.267614	0.217866	1.22834	0.814106	84488	68664
rs9866473	17	172922392	GA	+	713	0.991655	0.544371	0.445302	215	361	137	707	687	-0.0569119	-0.0609097	0.273259	0.238792	1.14434	0.873867	86327	75369
rs12712846	12	42607367	GA	+	717	0.997218	0.742455	0.349372	301	331	85	711	690	0.0603976	0.0508336	0.265843	0.346575	0.767057	1.30368	83902	109568
rs1567385	12	101681489	AG	+	719	1	0.472039	0.293463	363	290	66	713	692	0.0498075	0.0426878	0.375688	0.44661	0.8412	1.18878	118994	141591
rs2054247	3	129500916	GA	+	719	1	0.131318	0.0820584	609	102	8	713	692	-0.0541334	-0.0631722	0.56243	0.497308	1.13095	0.884213	178704	157787
rs1999088	5	96725605	AG	+	719	1	1	0.0236439	685	34	0	713	692	0.000826443	-0.0309843	0.996108	0.8528	1.16805	0.856131	316875	270889
rs1782644	2	80671181	AG	+	716	0.995828	0.188457	0.0949721	583	130	3	710	690	-0.0514227	0.00989384	0.567567	0.912914	0.621709	1.60847	180332	290189

## Sheet: S4h_SC_TG_NoLLT
SNP	Chromosome	Position	Coding	Strand	SampleSize.total	CallRate	p.HWE	Q.2	P.11	P.12	P.22	SampleSize.una	SampleSize.adj	effB.una	effB.adj	P1df.una	P1df.adj	p.ratio.unaBYadj	p.ratio.adjBYuna	SNP.rank.una	SNP.rank.adj
rs12540730	21	23450340	AG	+	719	1	0.156917	0.219054	445	233	41	713	692	0.0597695	0.0646294	0.338034	0.300036	1.12665	0.887589	107564	95920
rs3823763	21	33374419	AC	+	719	1	0.454398	0.472879	205	348	166	713	692	-0.0414489	-0.0417058	0.432198	0.430004	1.0051	0.994922	137320	137023

## Sheet: S4i_NS_TC_NoLLT
name	chromosome	position	allele.reference	allele.effective	strand	MA.n	MA.beta	MA.sebeta	MA.p	MA.beta.ci95l	MA.beta.ci95u	GB.adu.nollt.n	GB.adu.nollt.beta	GB.adu.nollt.sebeta	GB.adu.nollt.p	NL.nollt.n	NL.nollt.beta	NL.nollt.sebeta	NL.nollt.p	HR.nollt.n	HR.nollt.beta	HR.nollt.sebeta	HR.nollt.p	IT.nollt.n	IT.nollt.beta	IT.nollt.sebeta	IT.nollt.p
rs2000999	16	70665594	G	A	+	3110	0.0571218	0.0302884	0.0593042	-0.00224233	0.116486	705	0.154311	0.0743172	0.0378587	674	0.100465	0.0635881	0.114124	702	0.0537699	0.0594634	0.365862	1029	-0.0151156	-0.0513757	0.768592
rs2186830	18	423431	G	A	+	3149	-0.0510009	0.0272351	0.0611218	-0.104381	0.00237901	702	0.00405677	0.0585908	0.944799	682	-0.173441	-0.0599107	0.00379158	732	0.000284644	0.0554883	0.995907	1033	-0.0478747	-0.04696	0.307976
rs5400	3	172214994	G	A	+	3170	0.0676906	0.0387111	0.0803582	-0.00818168	0.143563	713	0.0866623	0.083499	0.299324	684	0.0463503	0.0790504	0.557649	737	0.0713553	0.0724535	0.324701	1036	0.0676665	0.0759488	0.372956
rs222014	4	72851795	G	A	+	3191	-0.0461709	0.0407525	0.257232	-0.126044	0.0337026	711	-0.0709793	-0.0774132	0.359201	685	-0.10922	-0.100563	0.277443	759	-0.110583	-0.0929007	0.233916	1036	0.0347195	0.0673415	0.606152
rs669552	3	173536358	A	G	+	3180	0.0361238	0.0385395	0.348594	-0.0394122	0.11166	713	0.123497	0.111027	0.266003	682	0.120257	0.0789987	0.127943	750	-0.0322199	-0.0804113	0.688649	1035	5.82994e-05	0.0600565	0.999225
rs12617790	2	31044277	A	G	+	3191	-0.0164373	0.0324581	0.612564	-0.080054	0.0471793	710	0.0340106	0.064289	0.596787	685	0.0233637	0.0736451	0.751056	759	-0.0459294	-0.0621411	0.459838	1037	-0.0615569	-0.0615576	0.317316
rs2070657	21	26276888	A	G	+	3191	-0.0160952	0.0328918	0.624603	-0.0805618	0.0483715	710	0.000819539	0.0684068	0.990441	685	-0.161388	-0.0694392	0.0201165	760	0.0194075	0.067531	0.773816	1036	0.0498754	0.0593433	0.400653
rs47137	6	134367799	A	C	+	3173	-0.00741202	0.0256746	0.772818	-0.0577333	0.0429093	700	-0.0575384	-0.0540337	0.286939	684	0.0971281	0.0560461	0.0830946	753	-0.0302073	-0.0512421	0.555525	1036	-0.023045	-0.0458678	0.61537
rs10041333	5	159586687	A	G	+	3191	0.00602058	0.02598	0.816741	-0.0448994	0.0569405	713	0.0508691	0.0563923	0.367026	685	0.0042857	0.0534151	0.936051	756	-0.0316884	-0.0514586	0.538025	1037	0.00771937	0.0477287	0.871515
rs2303324	2	31042740	G	A	+	3122	-0.00822703	0.0373248	0.825546	-0.0813822	0.0649282	708	0.0283456	0.0715631	0.692037	664	0.0172812	0.0889255	0.845915	715	-0.0573555	-0.0739593	0.438044	1035	-0.0147239	-0.0684761	0.829749
rs2478571	10	18322433	G	A	+	3162	0.00181288	0.0275443	0.947524	-0.052173	0.0557987	692	-0.0461586	-0.0586242	0.431069	680	0.0440625	0.0577945	0.445822	758	0.0344657	0.0540847	0.523959	1032	-0.023724	-0.0509085	0.641207

[truncated: 3 more sheets: S4j_NS_LDL-C_NoLLT, S4k_NS_HDL-C_NoLLT, S4l_NS_TG_NoLLT]
